# Supplementary material for: Copper-coordination polymer-controlled Cu@N-rGO and CuO@C nanoparticle formation: reusable green catalyst for A3-coupling and nitroarene-reduction reactions
Source: Royal Society of Chemistry journal article supplement (doi:10.1039/c7dt02119d), 2017-01-01
Supplement: c7dt02119d1.pdf [file c7dt02119d1.pdf]

**Copper- Coordination Polymers Controlled Cu@N-rGO or CuO@C Nanoparticles  
Formation: Reusable Green Catalyst for A-3 Coupling and Nitroarene Reduction**

Vadivel Vinod Kumar,<sup>a)</sup> Rajamani Rajmohan,<sup>a)</sup> Pothiappan Vairaprakash,<sup>a)</sup> Mariappan  
Mariappan<sup>b)</sup> and Savarimuthu Philip Anthony<sup>\*a)</sup>

<sup>a)</sup>Department of Chemistry, School of Chemical & Biotechnology, SASTRA University,  
Thanjavur – 613401, Tamil Nadu, INDIA. E-mail: [philip@biotech.sastra.edu](mailto:philip@biotech.sastra.edu)

<sup>b)</sup>Department of Chemistry, SRM University, Chennai-603203, Tamil Nadu, India.

Page 2. PXRD pattern of Cu-COPs (Figure S1)

Page 3. FTIR spectra of Cu-COPs before and after calcination (Figure S2)

Page 4 -11. XPS spectra of CuNPs and CuONPs (Figure S3 to Figure S10).

Page 12. FE-SEM images of CuNPs-1 and CuONPs-4 (Figure S11).

Page 13. EDX spectra of CuNPs-1 and CuONPs-4 (Figure S12).

Page 14. Molecular packing of Cu-COP-1, Cu-COP-5, Cu-COP-6 and Cu-COP-7 (Figure S13).

Page 15 and 16. Atomic weight percentage of Cu/CuONPs (Table S1).

Page 17. Acid stability of CuNPs-1 and CuONPs-4 (Figure S14).

Page 18. The tentative mechanism of CuNPs-1 for A<sup>3</sup> coupling reaction (Scheme S1).

Page 19 to 26. <sup>1</sup>HNMR spectra A3 coupling reaction products (Figure S15).

Page 27 to 37. <sup>1</sup>HNMR spectra nitroarene reduction reaction products (Figure S16).

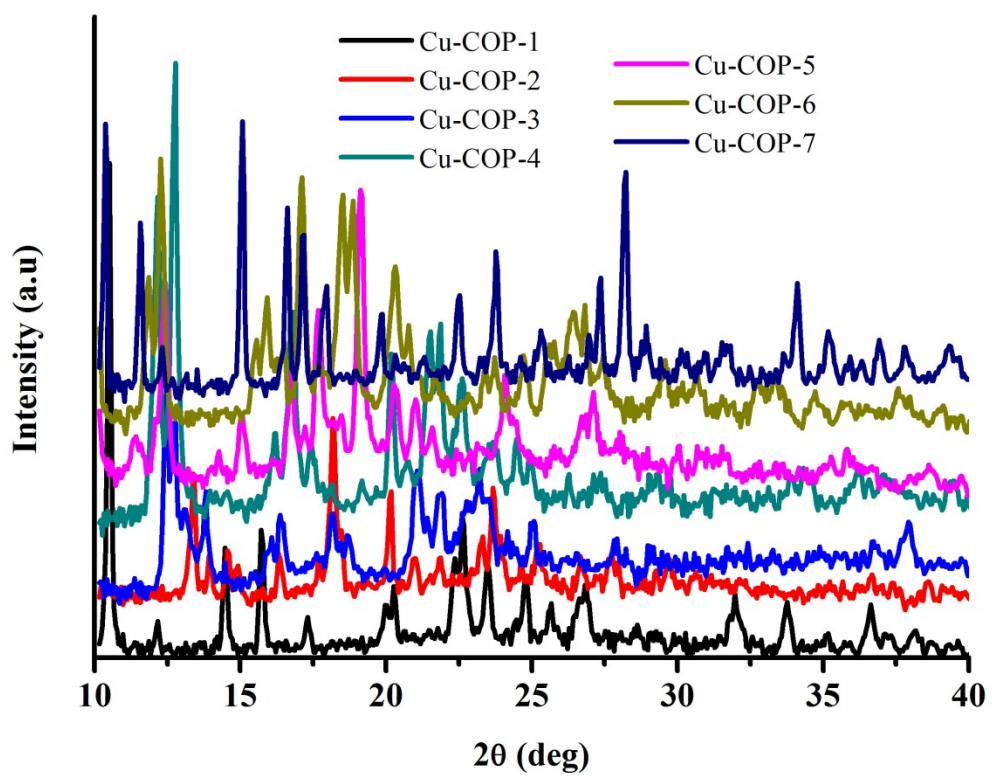

Figure S1. PXRD pattern of Cu-COPs.

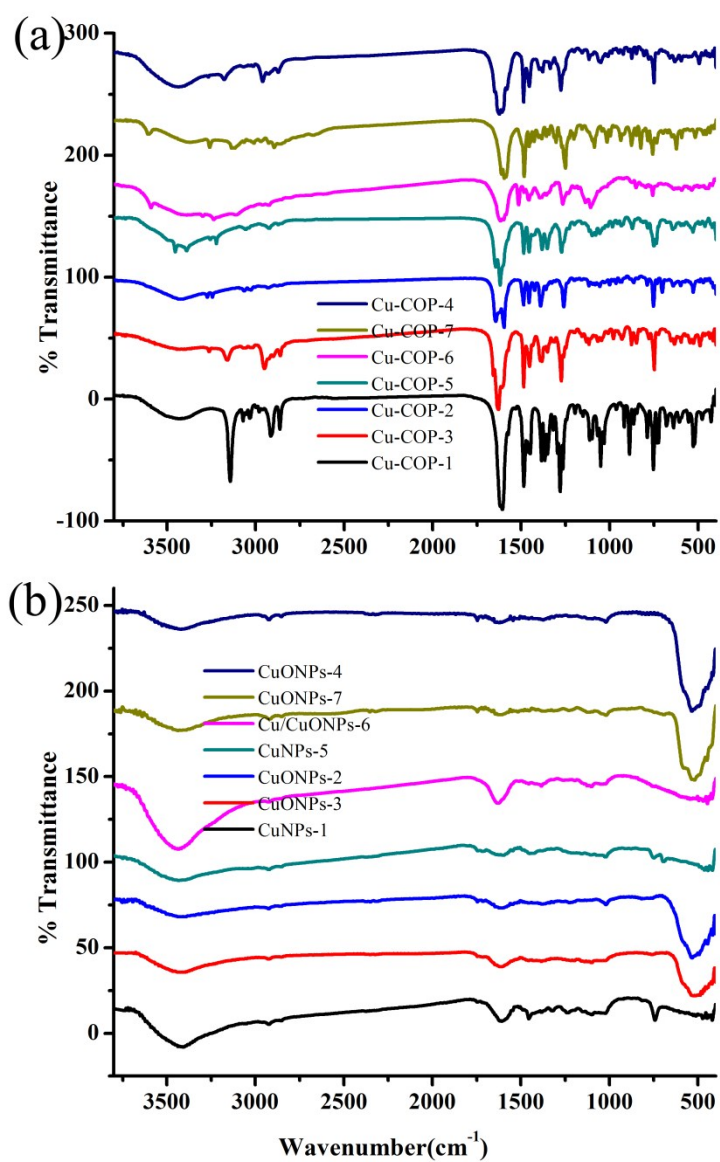

Figure S2. FTIR spectra of (a) Cu-COPs and (b) Cu-COPs after calcination.

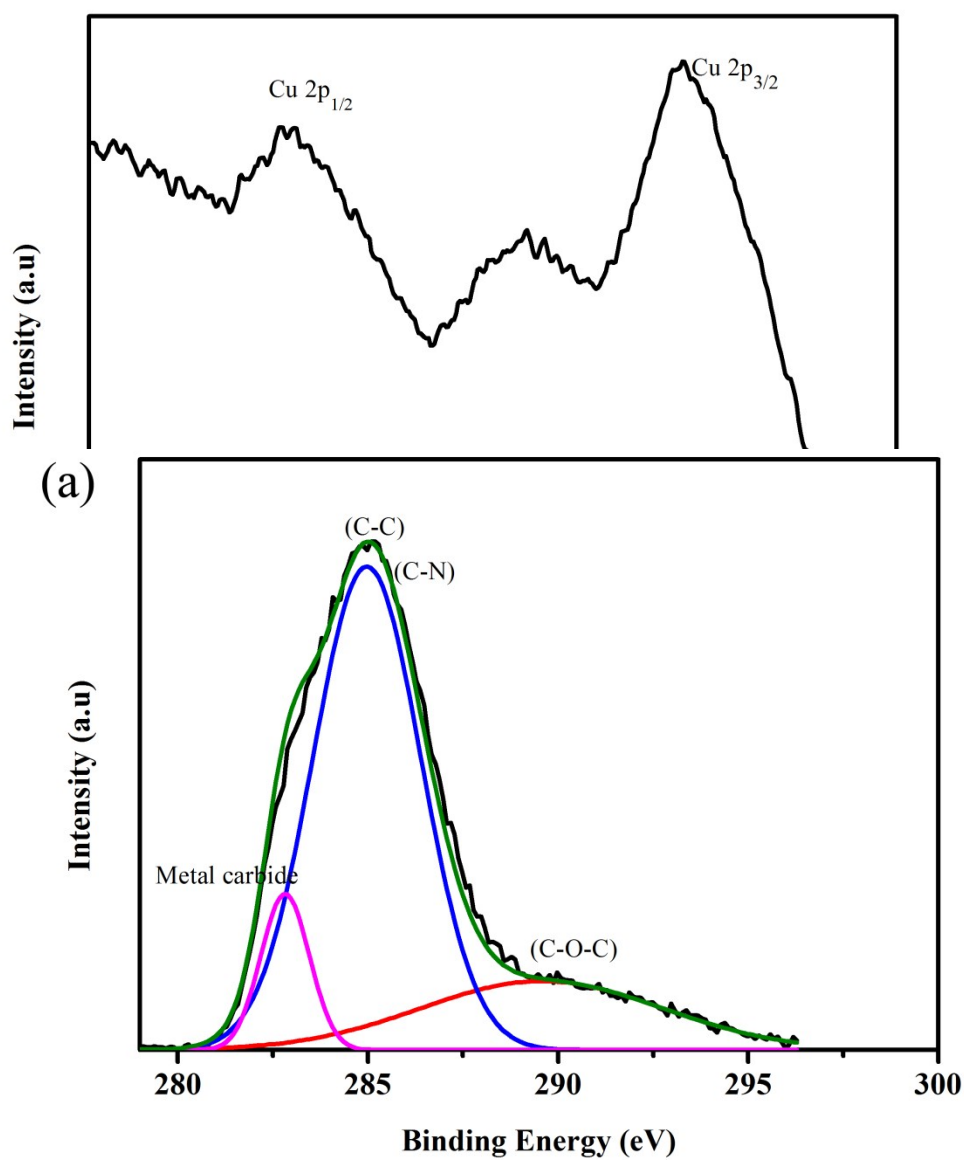

Figure S3.  
XPS  
spectra of  
CuNPs-1  
Cu.

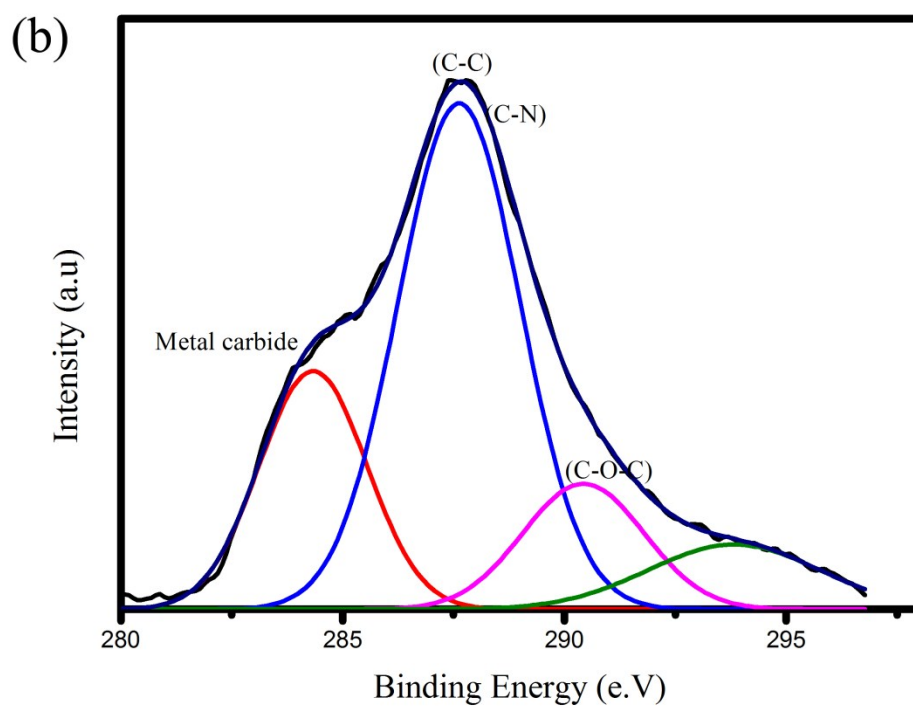

Figure S4. XPS spectra of (a) CuNPs-1 and (b) CuNPs-5 for C.

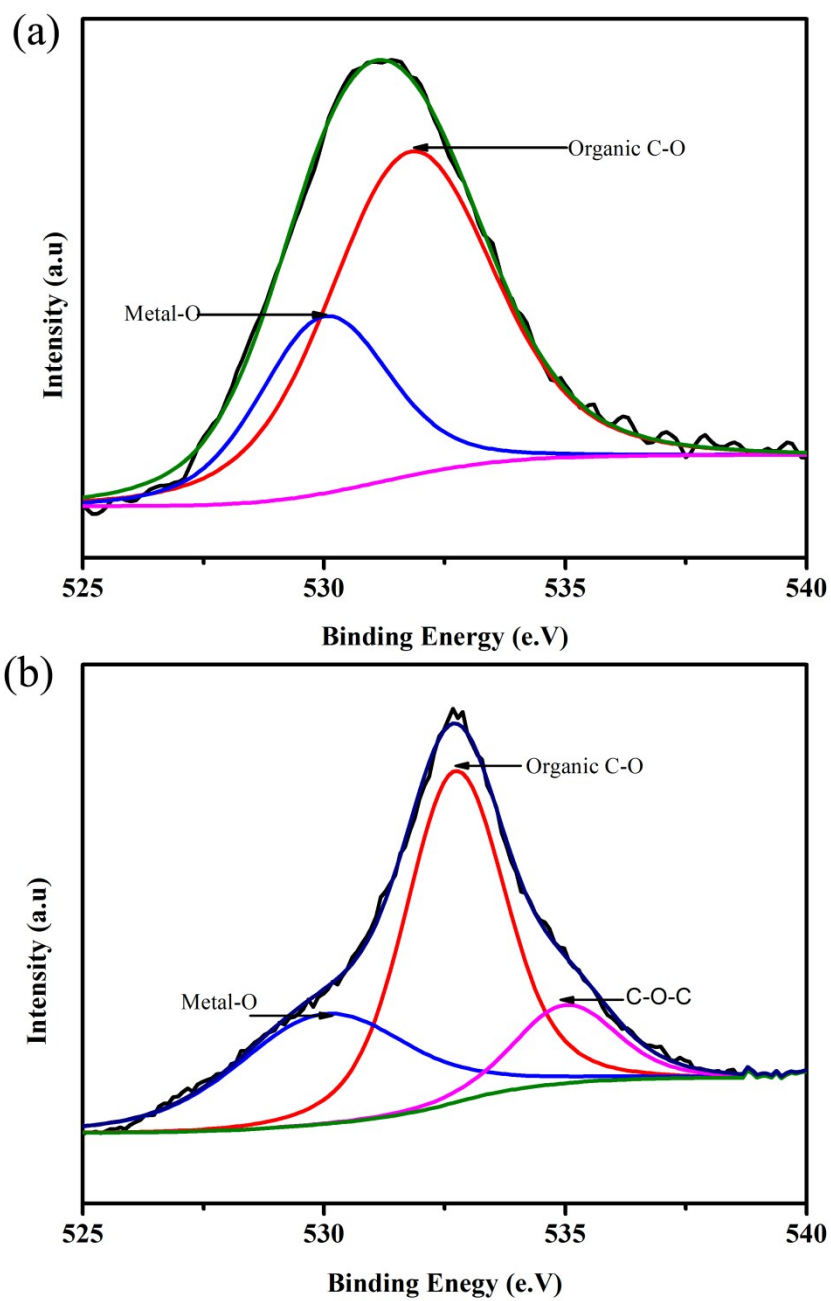

Figure S5. XPS spectra of (a) CuNPs-1 and (b) CuNPs-5 for O.

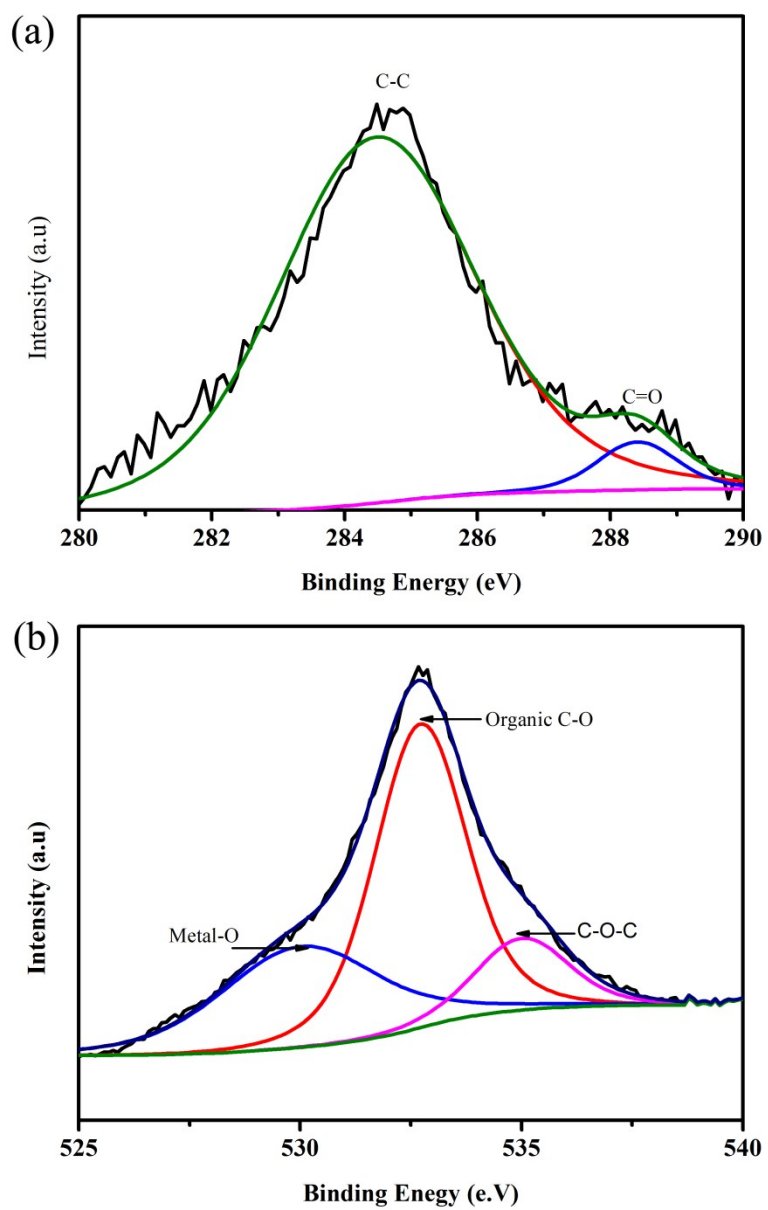

Figure S6. XPS spectra of CuONPs-2 (a) C and (b) O.

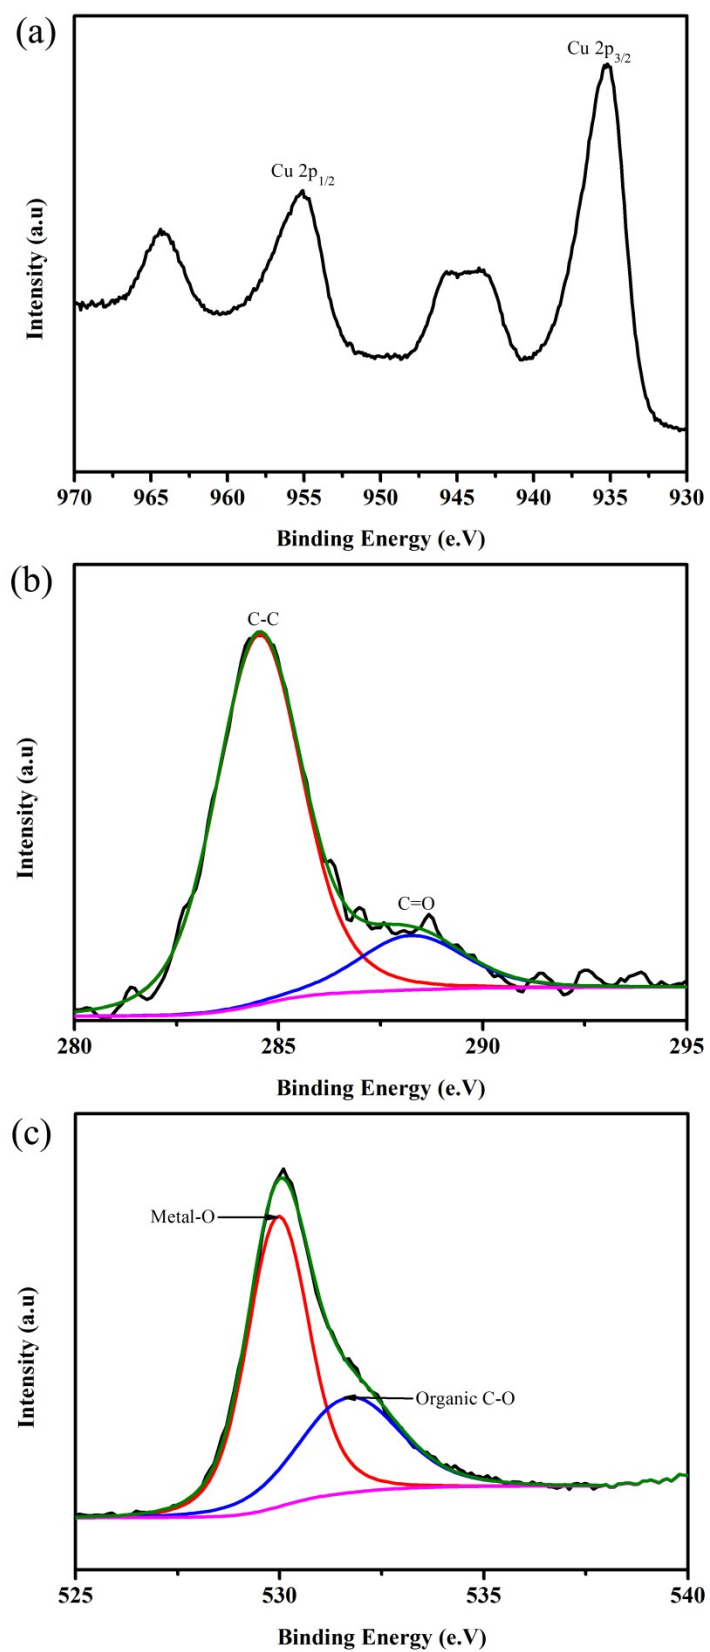

Figure S7. XPS spectra of CuONPs-3 (a) Cu, (b) C and (c) O.



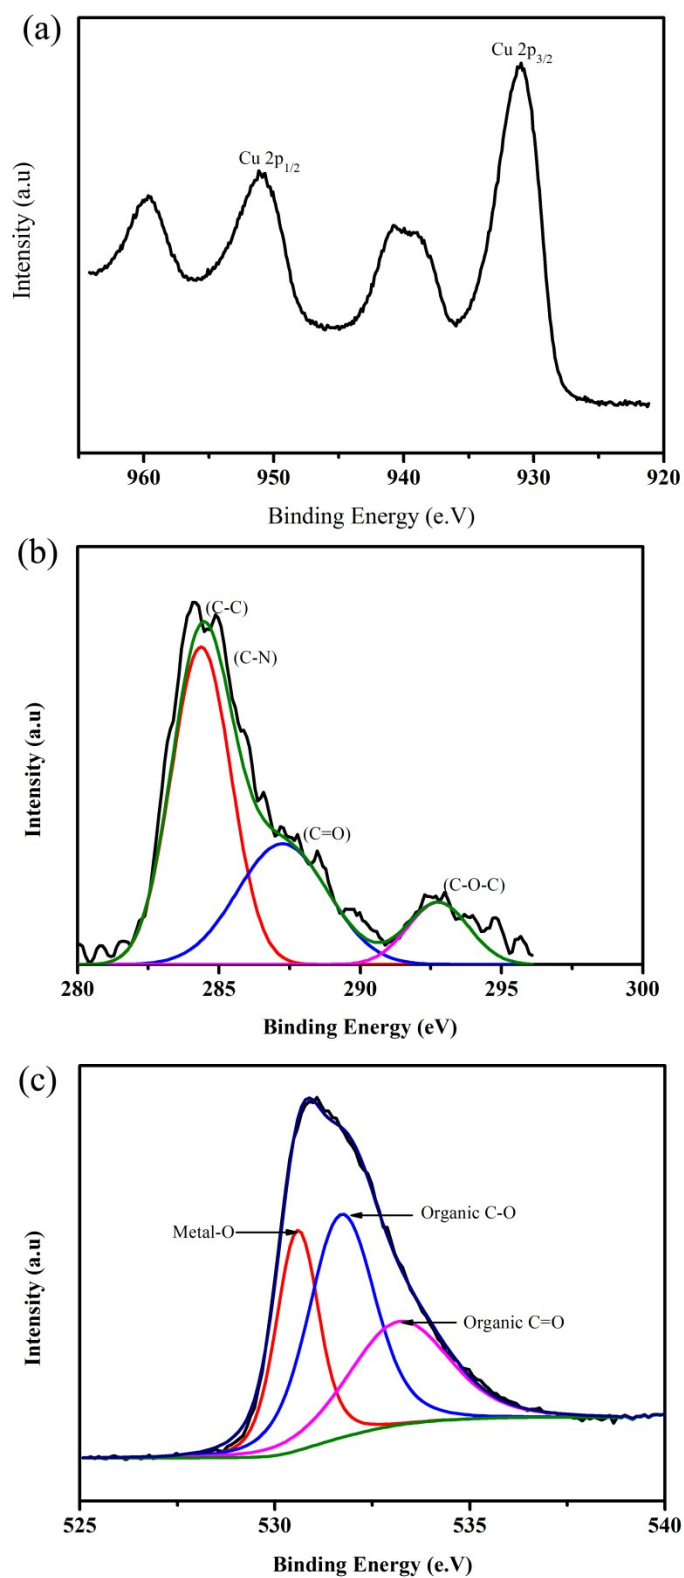

Figure S8. XPS spectra of CuONPs-4 (a) Cu, (b) C and (c) O.

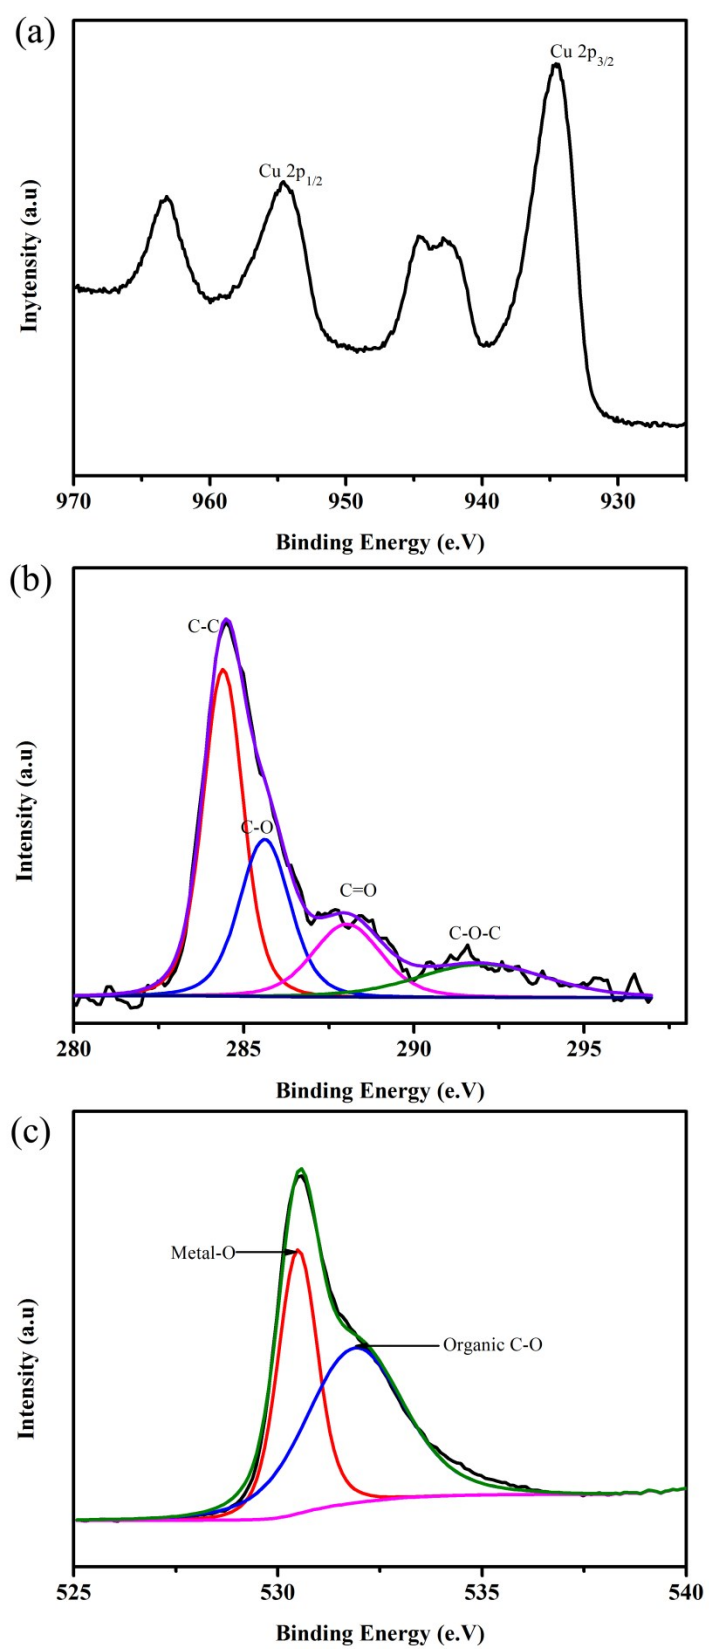

Figure S9. XPS spectra of CuONPs-7 (a) Cu, (b) C and (c) O.

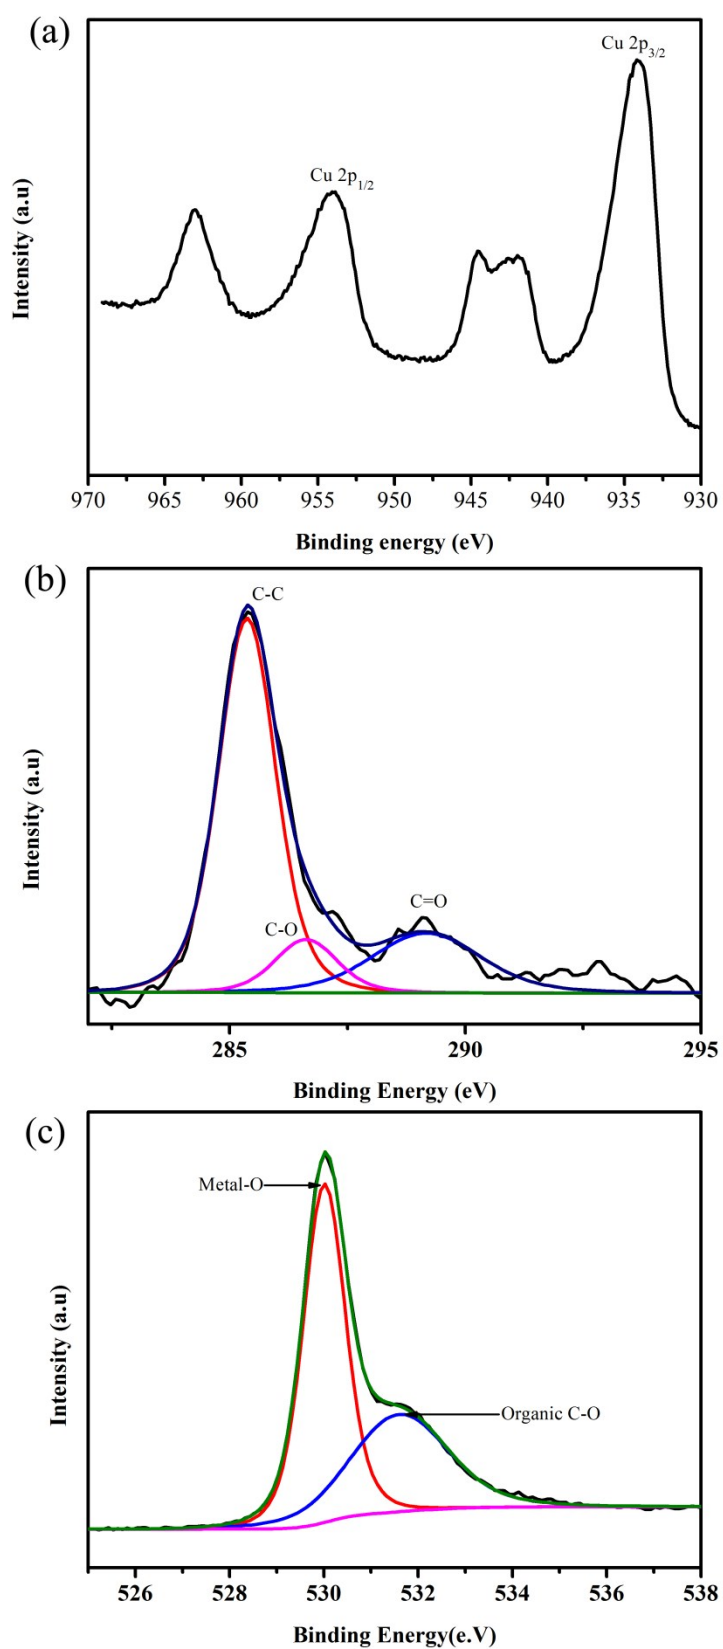

Figure S10. XPS spectra of CuONPs-6 (a) Cu, (b) C and (c) O.

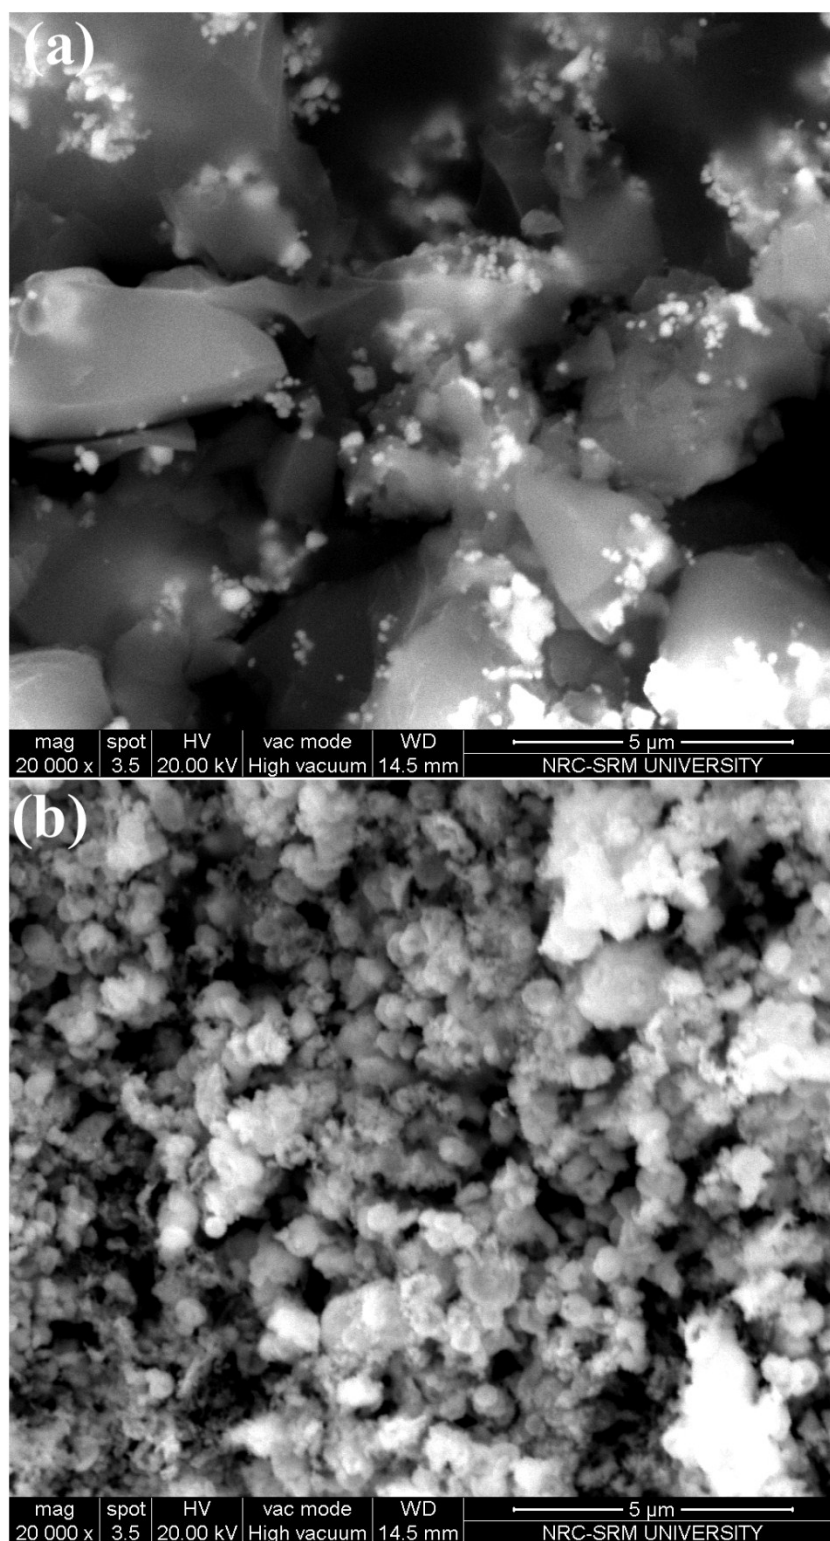

Figure S11. FE-SEM images of (a) CuNPs-1 and (b) CuONPs-4.

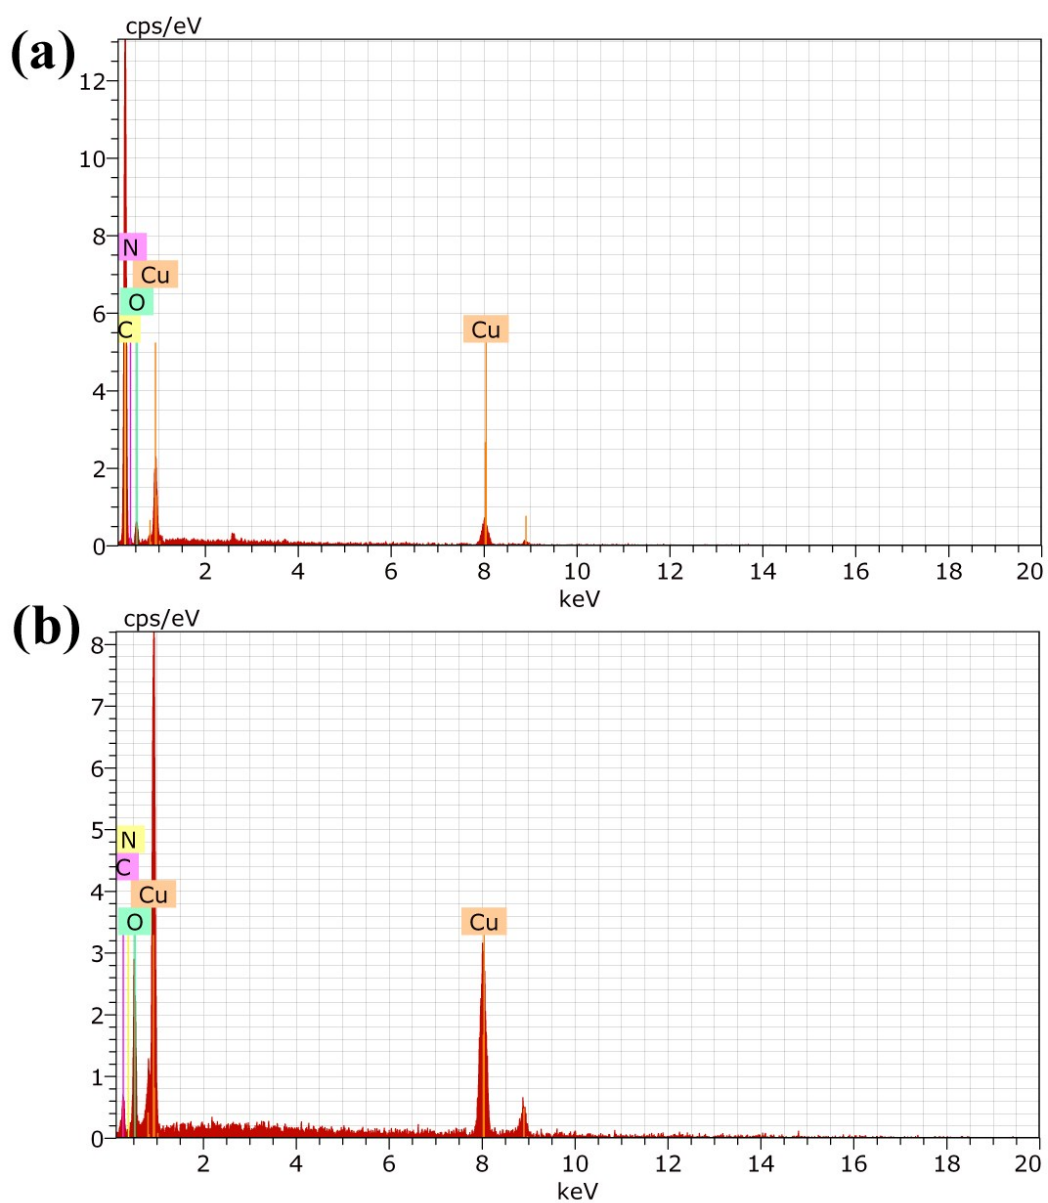

Figure S12. EDAX spectra of (a) CuNPs-1 and (b) CuONPs-4.

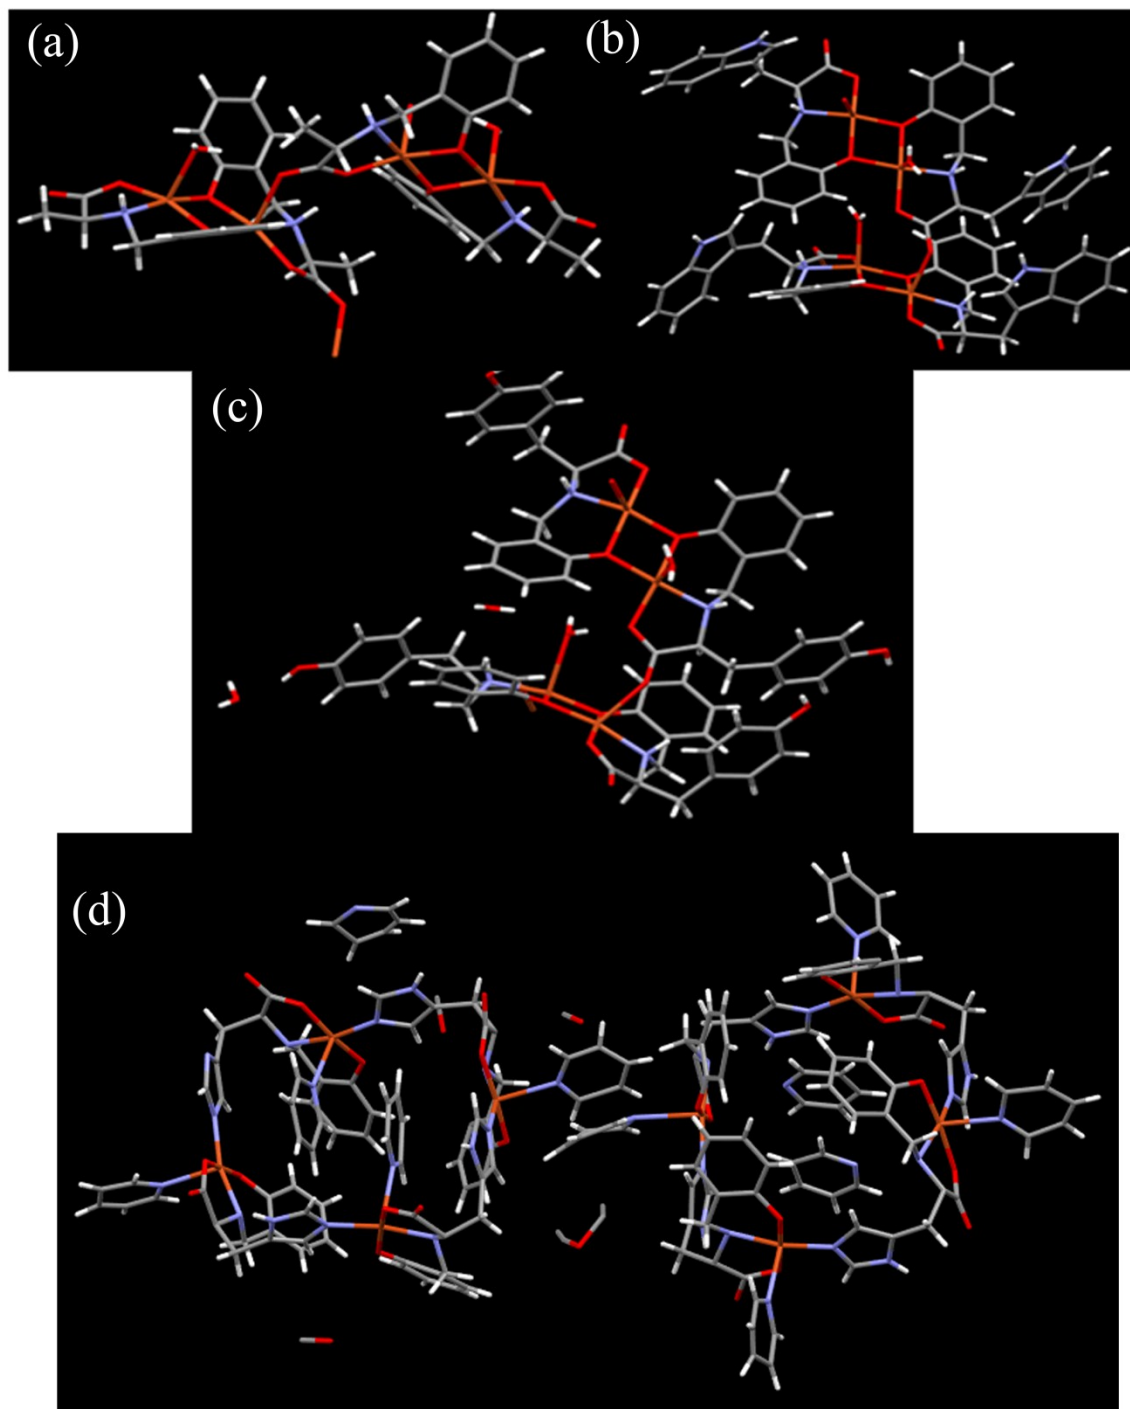

Figure S13. Molecular packing of (a) Cu-COP-1 (CCDC No. 133087), (b) Cu-COP-5 (CCDC No. 209715), (c) Cu-COP-6 (CCDC No. 209714) and (d) Cu-COP-7 (CCDC No. 197602) in solid state.

Table S1. Atomic weight percentage of Cu/CuONPs obtained from XPS analysis.

| <b>CuNPs-1</b> | Peak BE | FWHM<br>eV | Area (P)<br>CPS.eV | Atomic % |
|----------------|---------|------------|--------------------|----------|
|----------------|---------|------------|--------------------|----------|

|      |        |      |          |       |
|------|--------|------|----------|-------|
| C1s  | 286.62 | 4.20 | 78104.71 | 81.57 |
| N1s  | 401.30 | 4.11 | 13099.65 | 8.07  |
| O1s  | 533.98 | 4.54 | 22406.13 | 9.17  |
| Cu2p | 935.73 | 6.09 | 17999.53 | 1.18  |

| <b>CuNPs-5</b> | Peak BE | FWHM<br>eV | Area (P)<br>CPS.eV | Atomic % |
|----------------|---------|------------|--------------------|----------|
| C1s            | 289.08  | 7.27       | 556227.95          | 73.63    |
| N1s            | 402.08  | 7.72       | 37517.10           | 2.76     |
| O1s            | 537.08  | 8.01       | 486249.09          | 21.97    |
| Cu2p           | 938.08  | 9.33       | 314433.41          | 1.64     |

| <b>CuONPs-2</b> | Peak BE | FWHM<br>eV | Area (P)<br>CPS.eV | Atomic % |
|-----------------|---------|------------|--------------------|----------|
| C1s             | 939.76  | 5.87       | 2823127.13         | 23.51    |
| N1s             | 401.16  | 0.54       | 1121.04            | 0.72     |
| O1s             | 536.81  | 4.69       | 1048264.88         | 54.32    |
| Cu2p            | 939.76  | 5.87       | 2823127.13         | 23.51    |

| <b>CuONPs-3</b> | Peak BE | FWHM<br>eV | Area (P)<br>CPS.eV | Atomic % |
|-----------------|---------|------------|--------------------|----------|
| C1s             | 287.23  | 2.51       | 15598.50           | 15.86    |
| N1s             | 401.67  | 0.76       | 1829.15            | 1.10     |
| O1s             | 531.96  | 2.13       | 108172.39          | 43.05    |
| Cu2p            | 935.26  | 3.28       | 626315.17          | 39.99    |



| <b>CuONPs-4</b> | Peak BE | FWHM eV | Area (P)<br>CPS.eV | Atomic % |
|-----------------|---------|---------|--------------------|----------|
| C1s             | 286.40  | 3.15    | 12199.88           | 11.73    |
| N1s             | 400.99  | 0.30    | 687.03             | 0.39     |
| O1s             | 531.18  | 3.08    | 121812.44          | 45.85    |
| Cu2p            | 934.90  | 3.78    | 695901.47          | 42.02    |

| <b>CuONPs-7</b> | Peak BE | FWHM eV | Area (P)<br>CPS.eV | Atomic % |
|-----------------|---------|---------|--------------------|----------|
| C1s             | 286.22  | 3.33    | 109236.79          | 13.34    |
| N1s             | 400.86  | 0.46    | 986.68             | 0.82     |
| O1s             | 531.35  | 3.33    | 989035.13          | 47.28    |
| Cu2p            | 935.01  | 4.05    | 3383743.20         | 39.38    |

| <b>Cu/CuONPs-6</b> | Peak BE | FWHM eV | Area (P)<br>CPS.eV | Atomic % |
|--------------------|---------|---------|--------------------|----------|
| C1s                | 285.98  | 2.77    | 149377.78          | 14.66    |
| N1s                | 401.42  | 0.51    | 1012.24            | 0.91     |
| O1s                | 531.09  | 2.99    | 1222401.21         | 46.96    |
| Cu2p               | 934.46  | 3.94    | 4105417.78         | 38.38    |

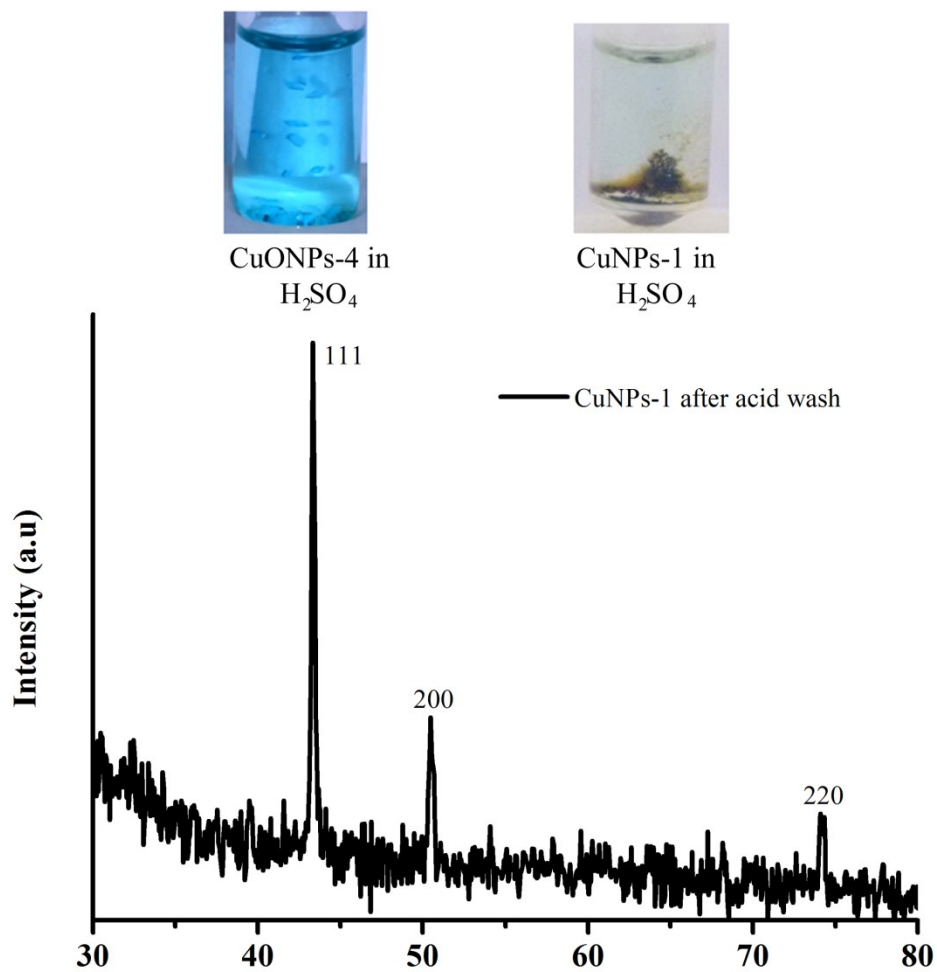

Figure S14. Digital images of CuONPs-4 and CuNPs-1 and PXRD pattern of CuNPs-1 after immersing in concentrated H<sub>2</sub>SO<sub>4</sub> (10 M).

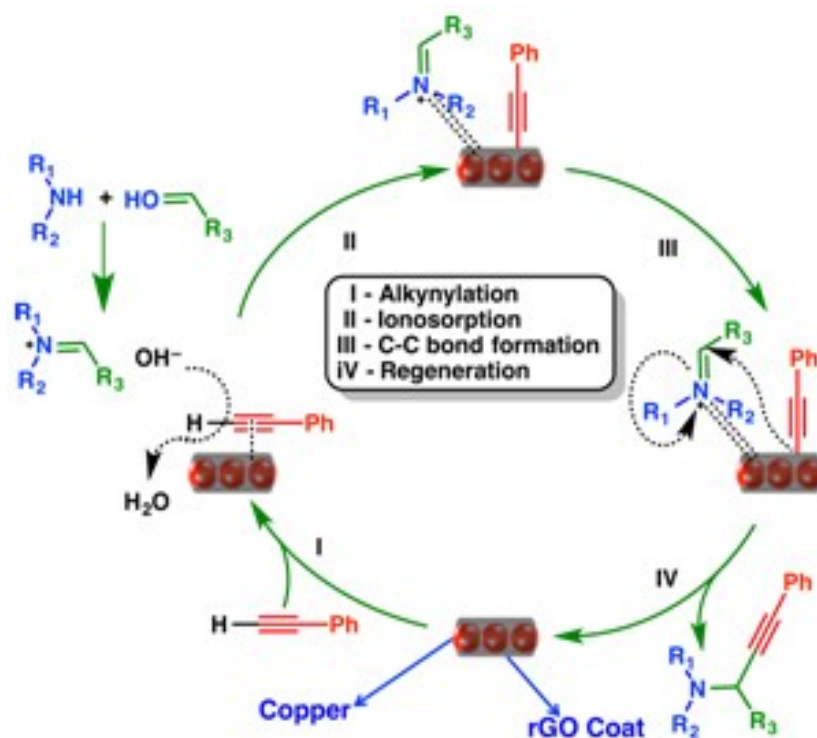

Scheme S1. The first step in A3 coupling is deprotonation of acetylene. Chelation of acetylene with N-rGO encapsulated CuNPs-1 might increase the labile nature of C-H bond in acetylene, thus weak base in the reaction medium could deprotonate the proton. The resulting iminium ion might get ionosorped on the surface of N-rGO encapsulated CuNPs-1. Further, electron transfer and C-C bond formation results in the formation of product and the regeneration of catalyst.

Figure S15. <sup>1</sup>H-NMR spectra of propargylamines obtained using CuNPs-1 catalyst.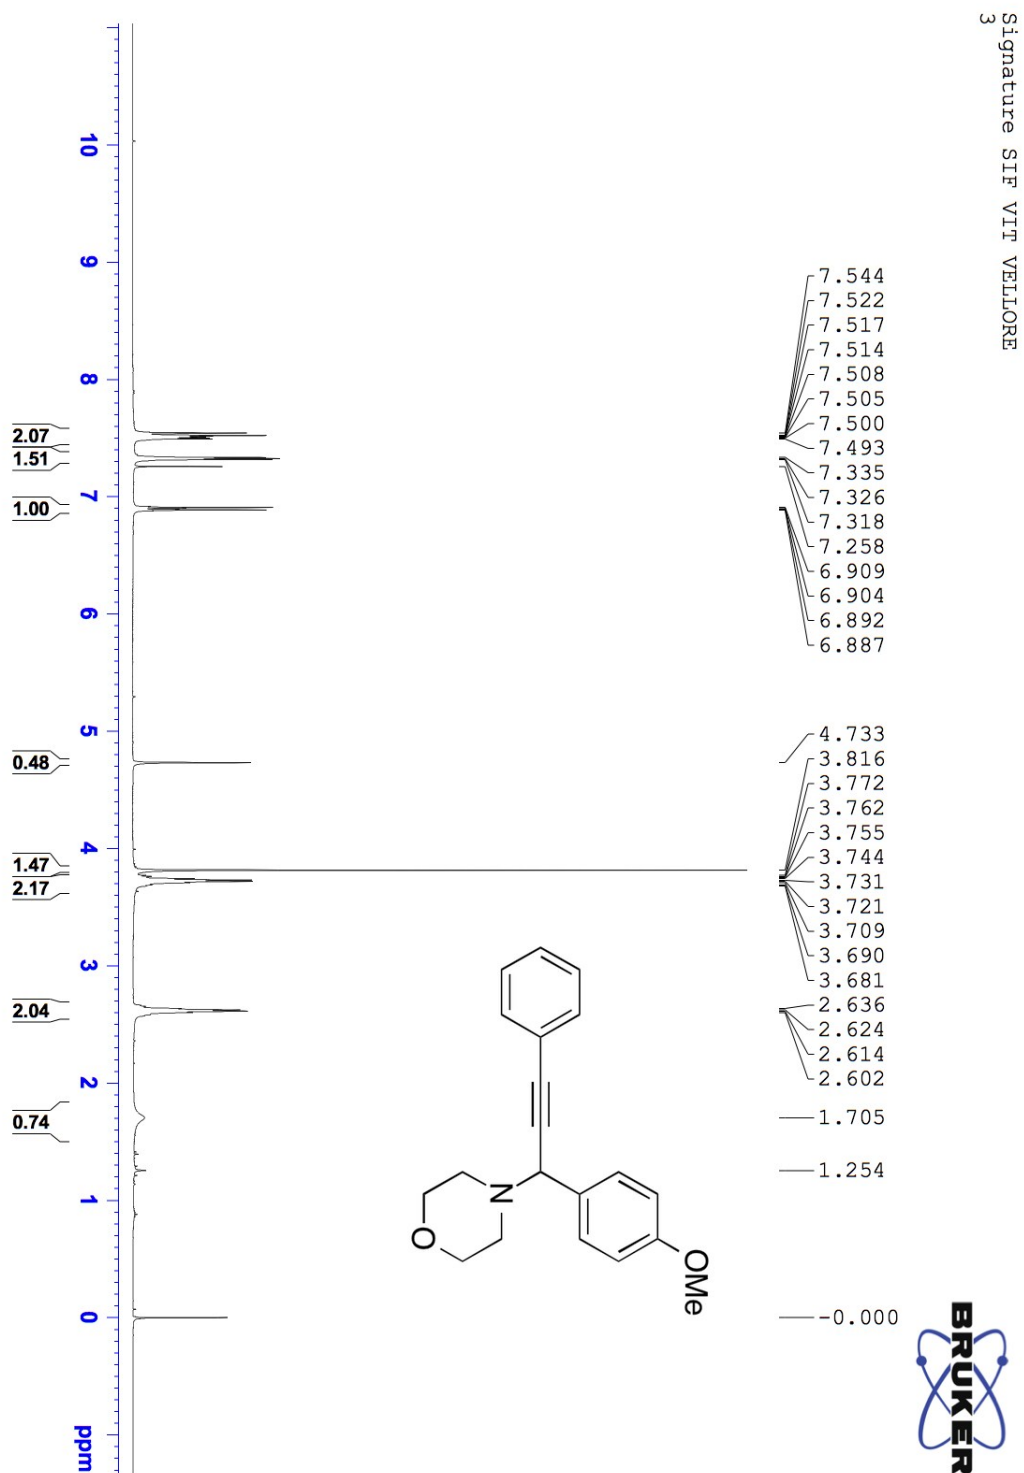

Entry-2

SIF VIT VELLORE  
5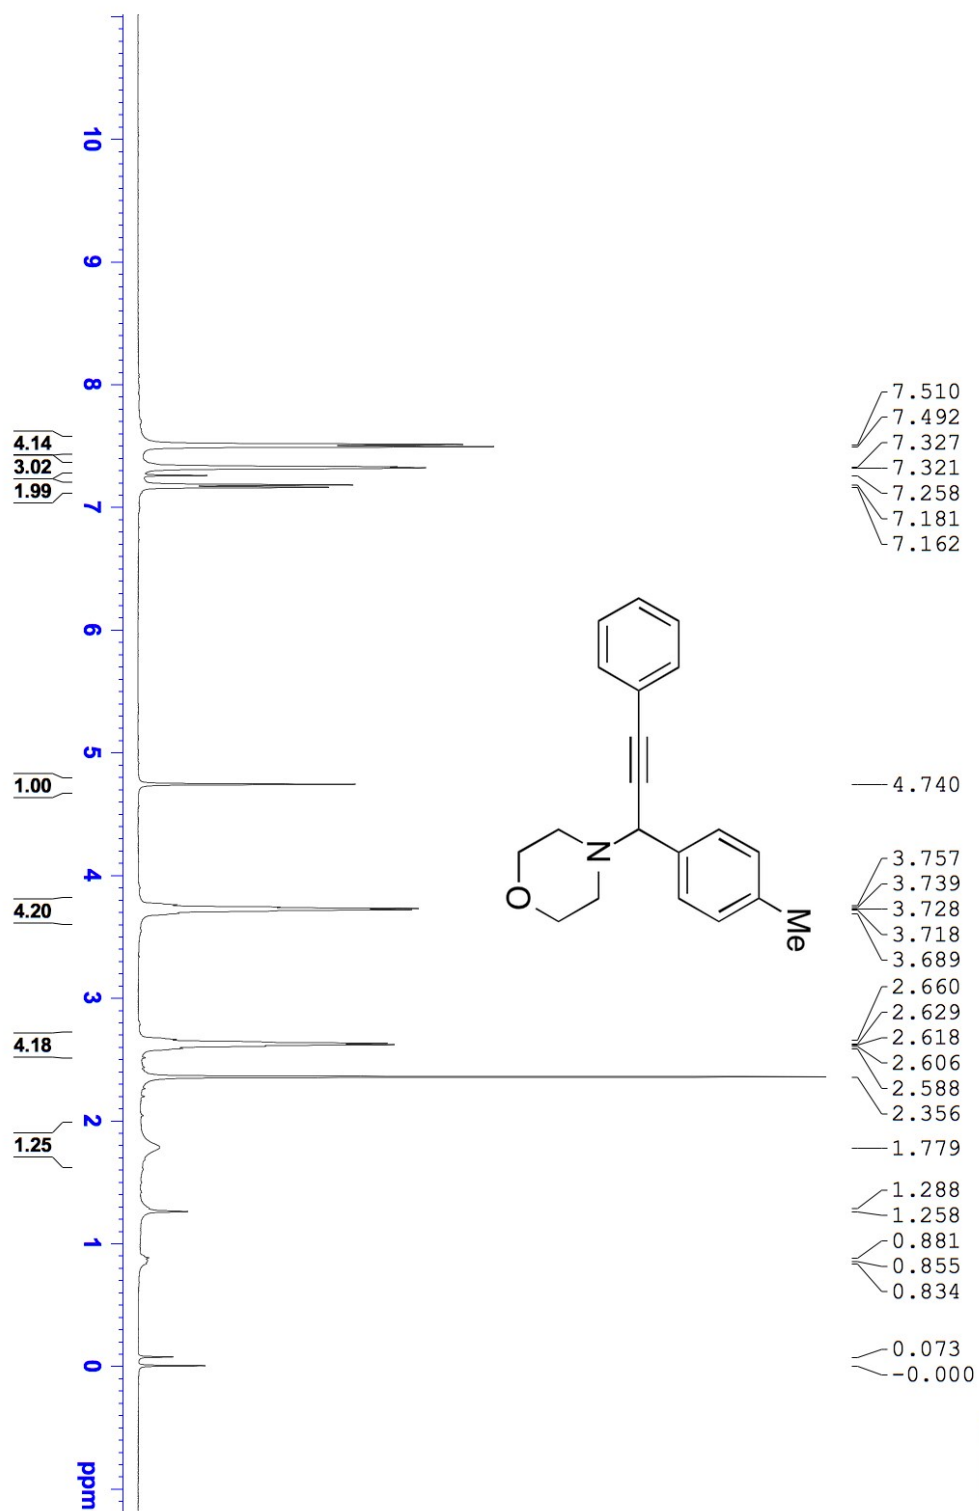

Entry-3

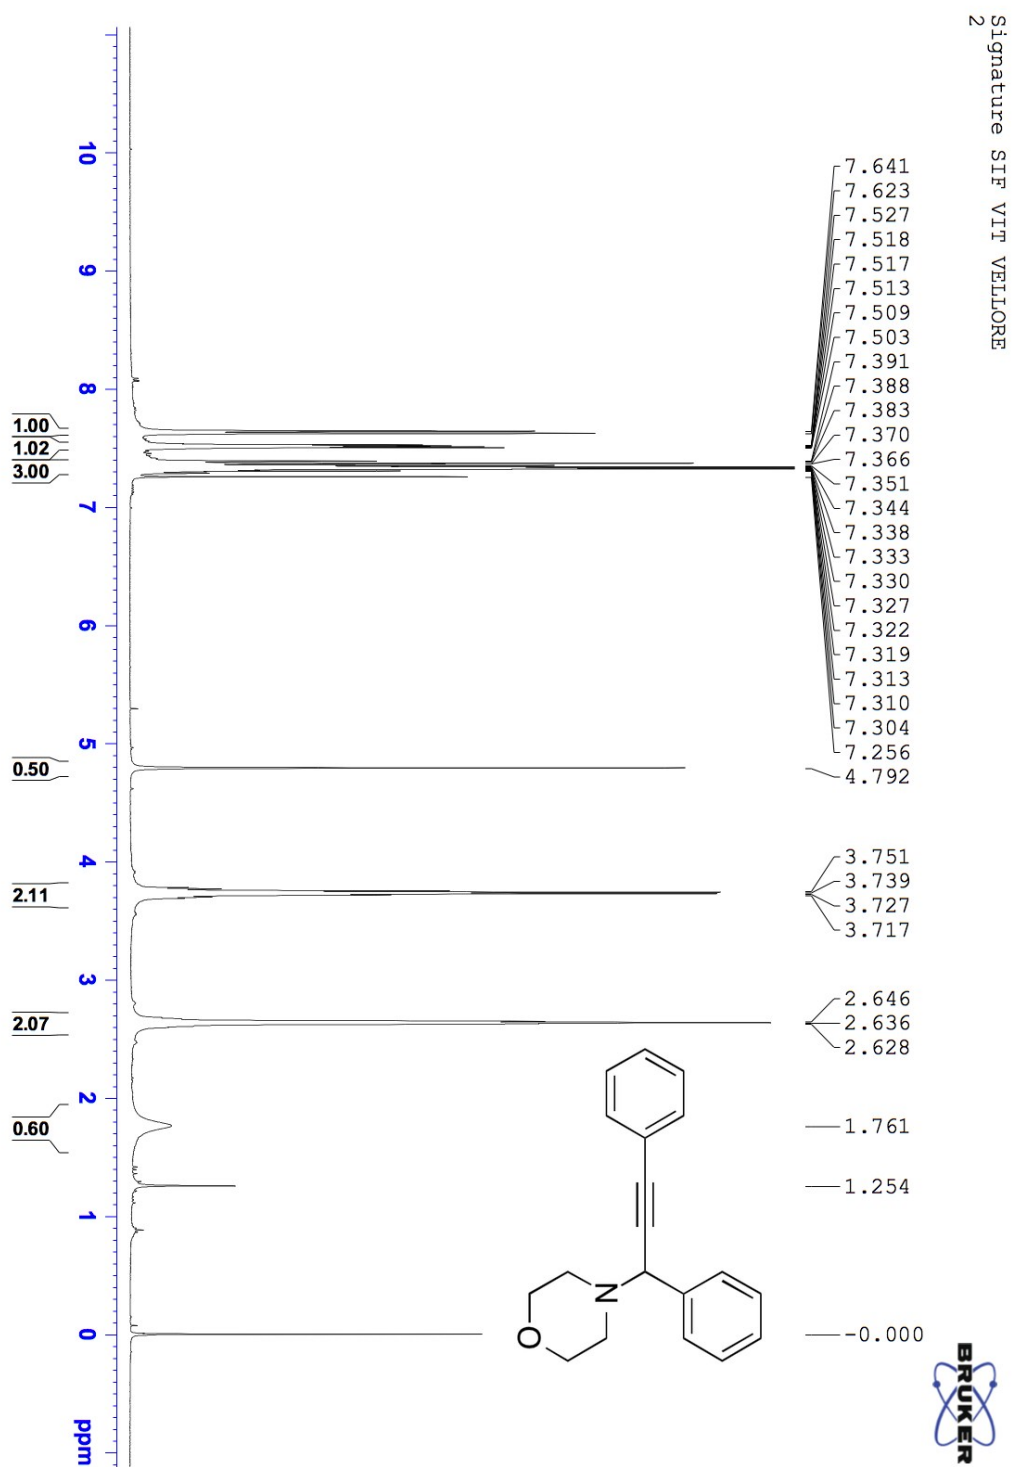

Entry-4

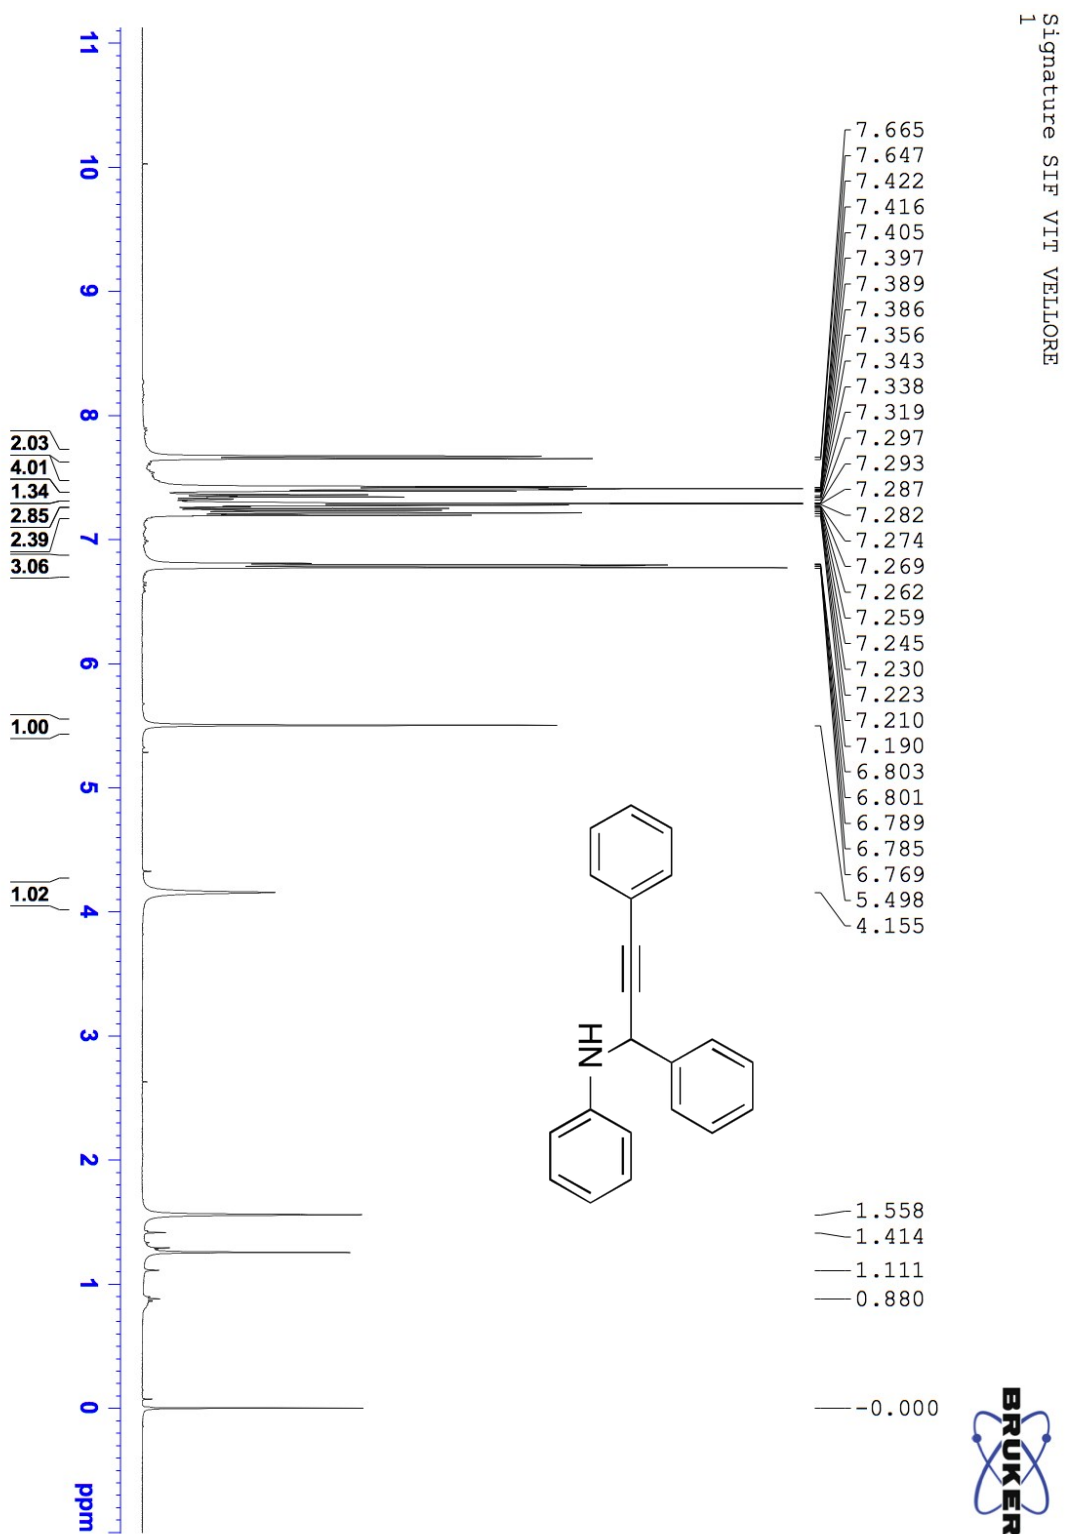

Entry-5

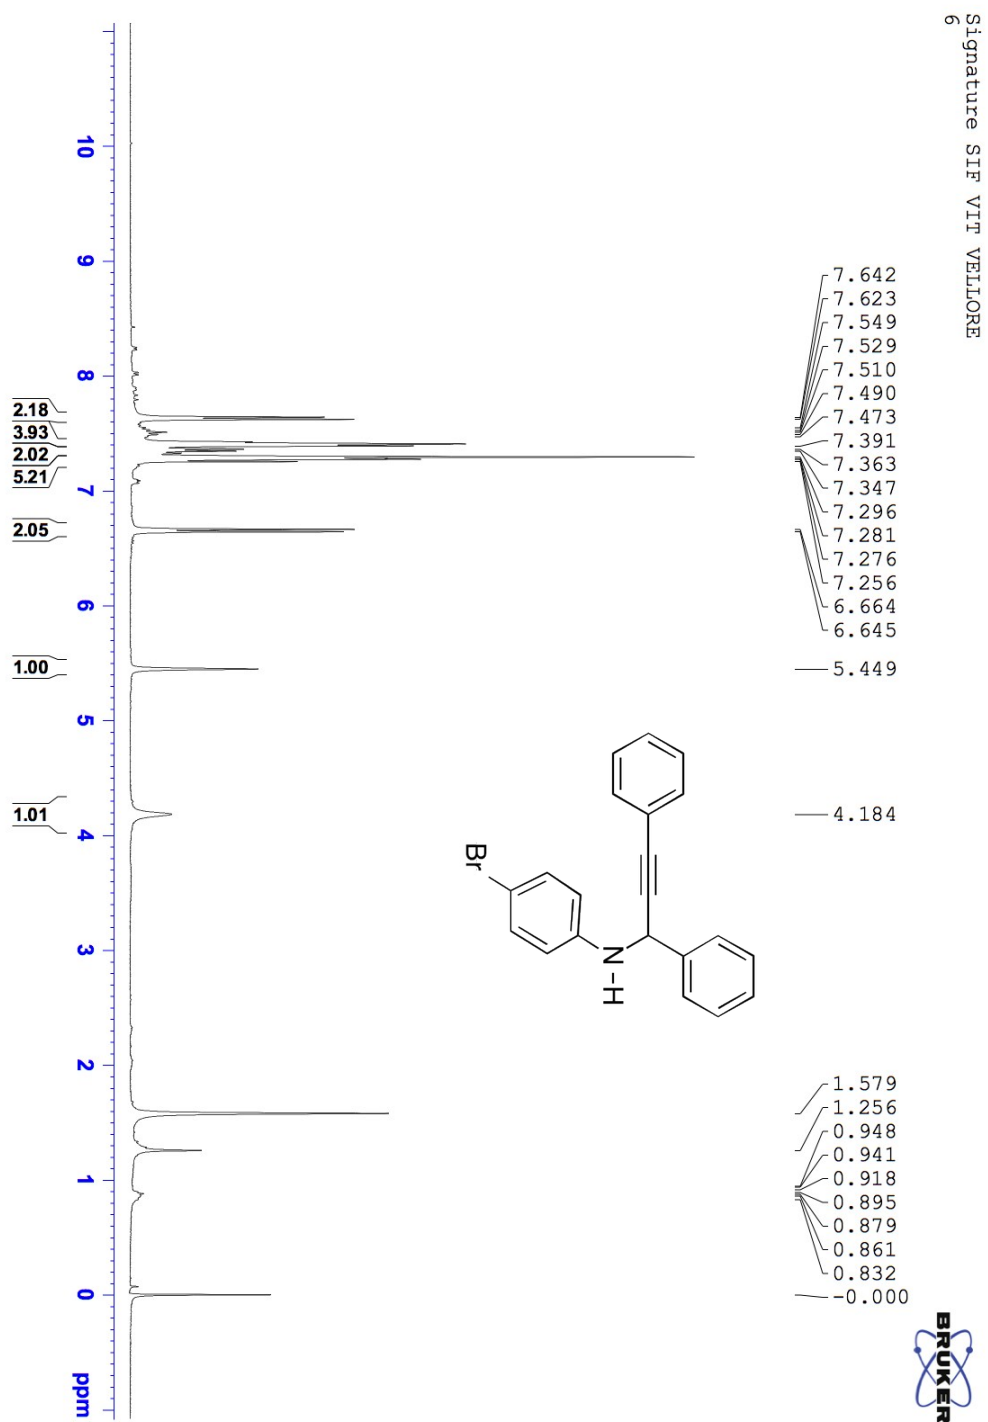

Entry-6



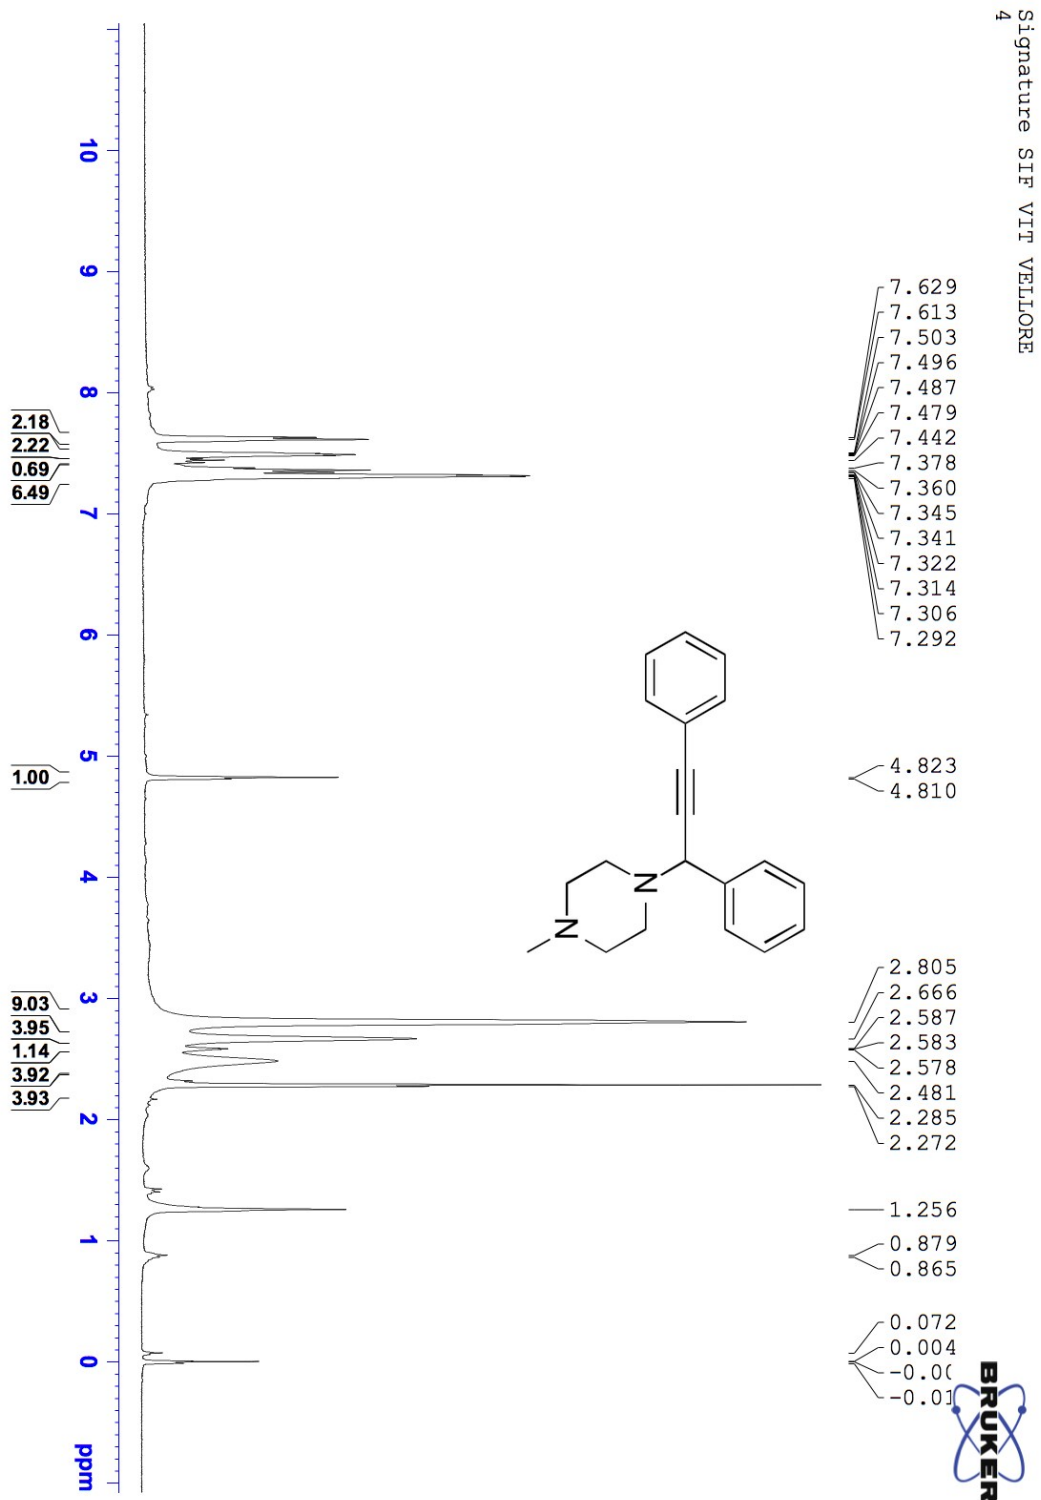

Entry-7

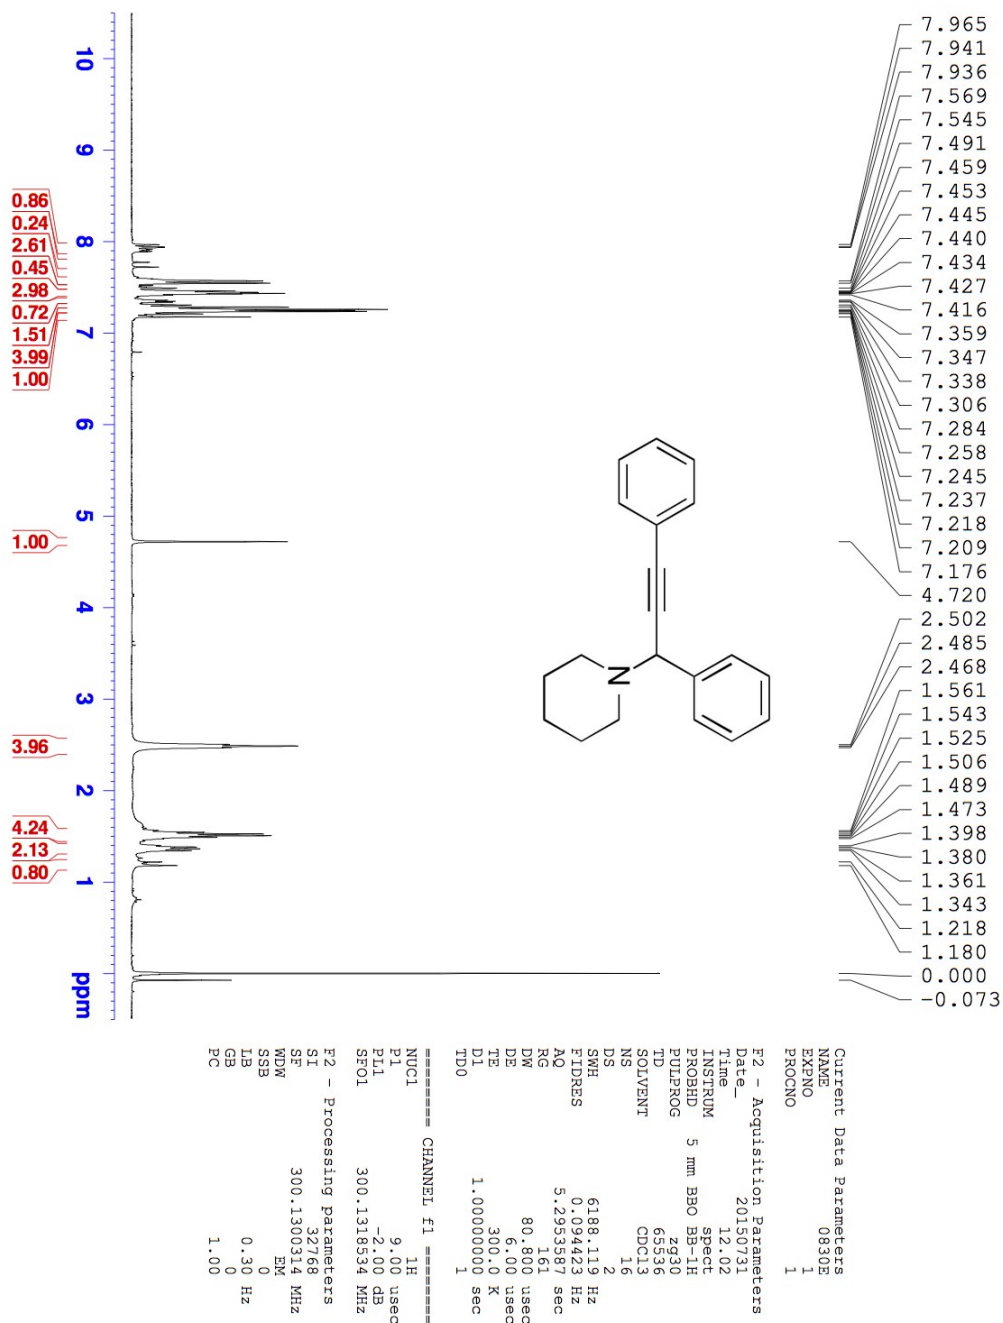

Entry-8

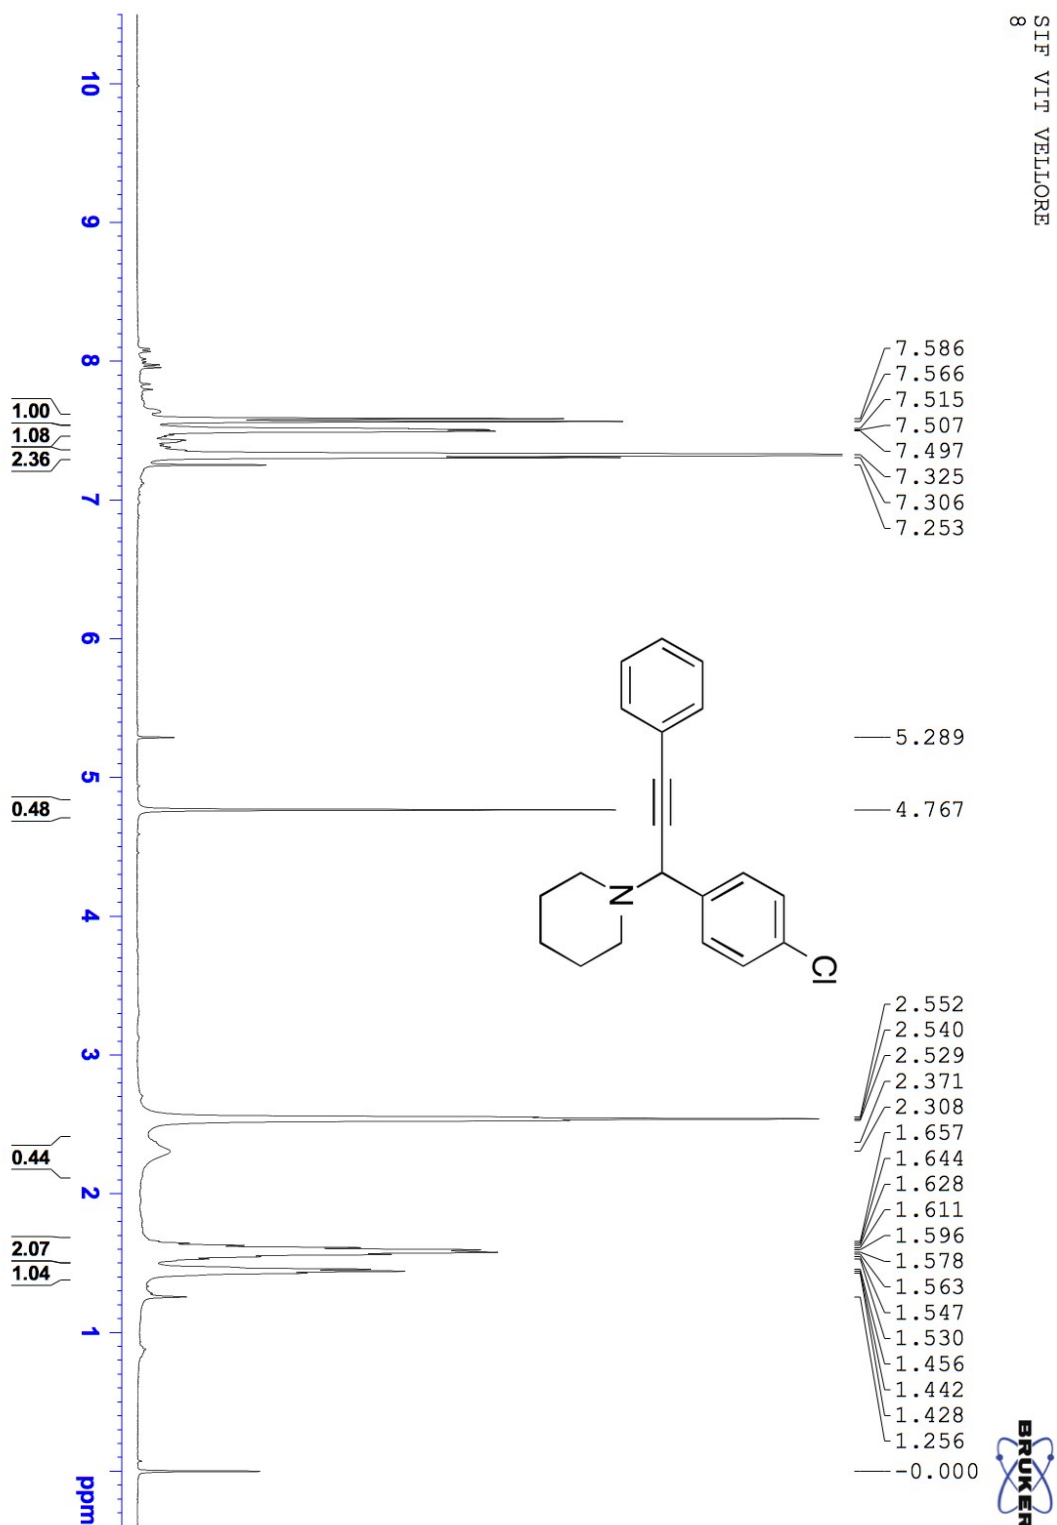

Entry-9

Figure S16.  $^1\text{H}$ -NMR spectra of products obtained using CuONPs-4 catalyst in the nitroarene reduction.

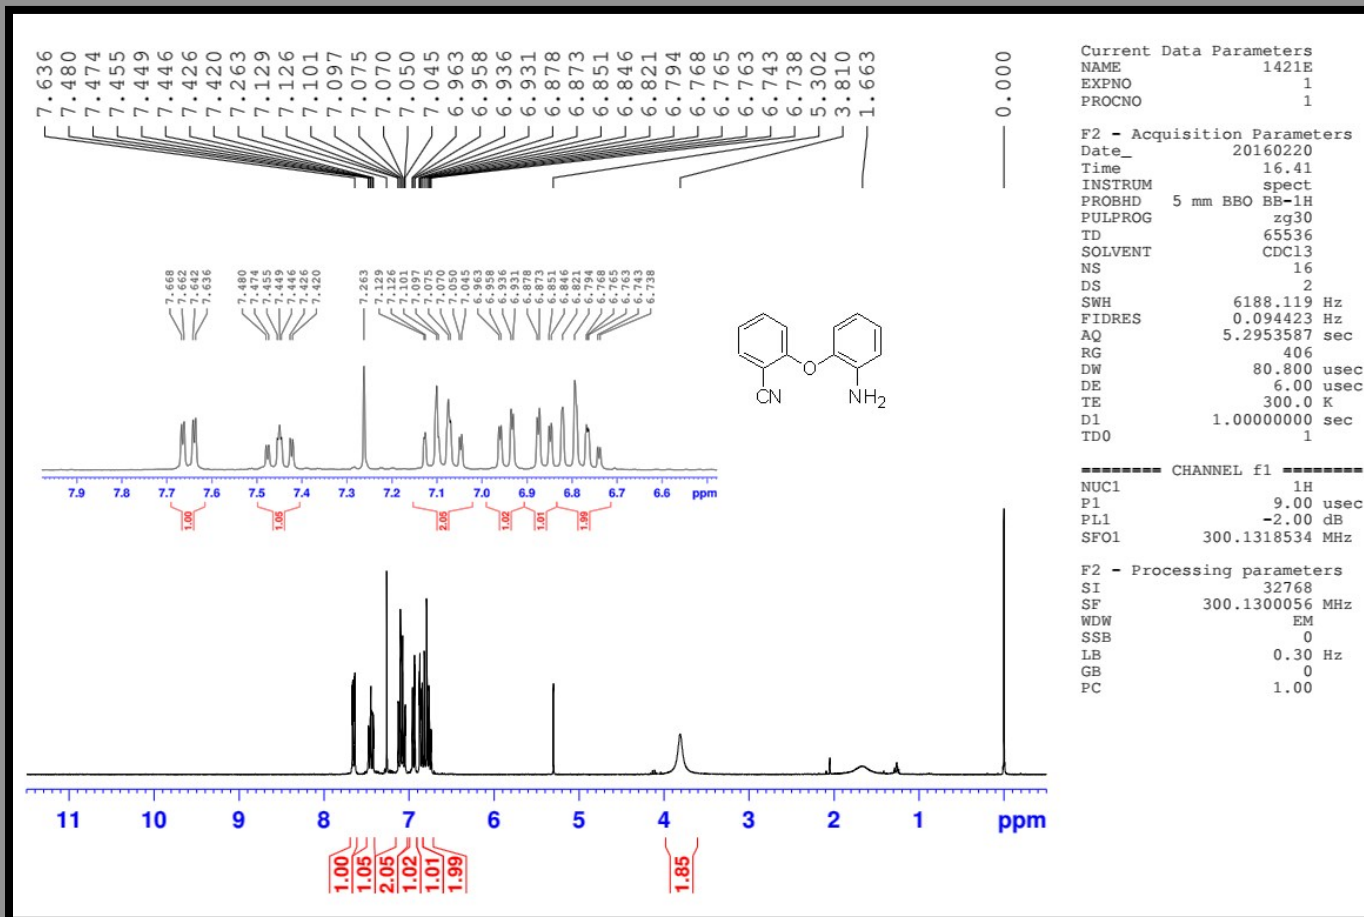

Entry-1

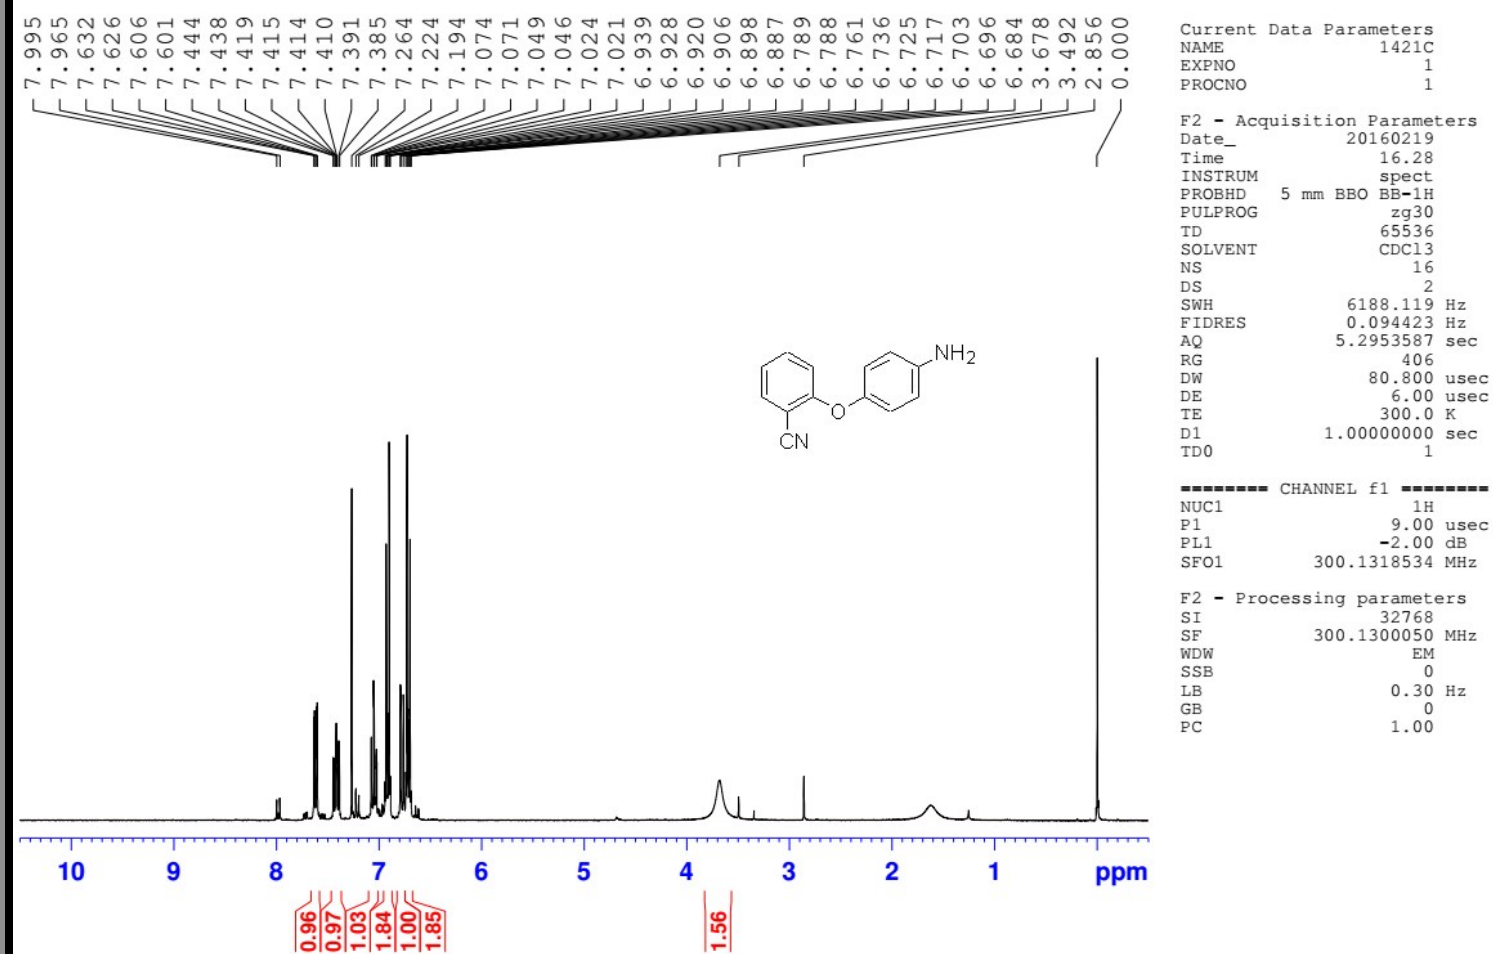

Entry-2

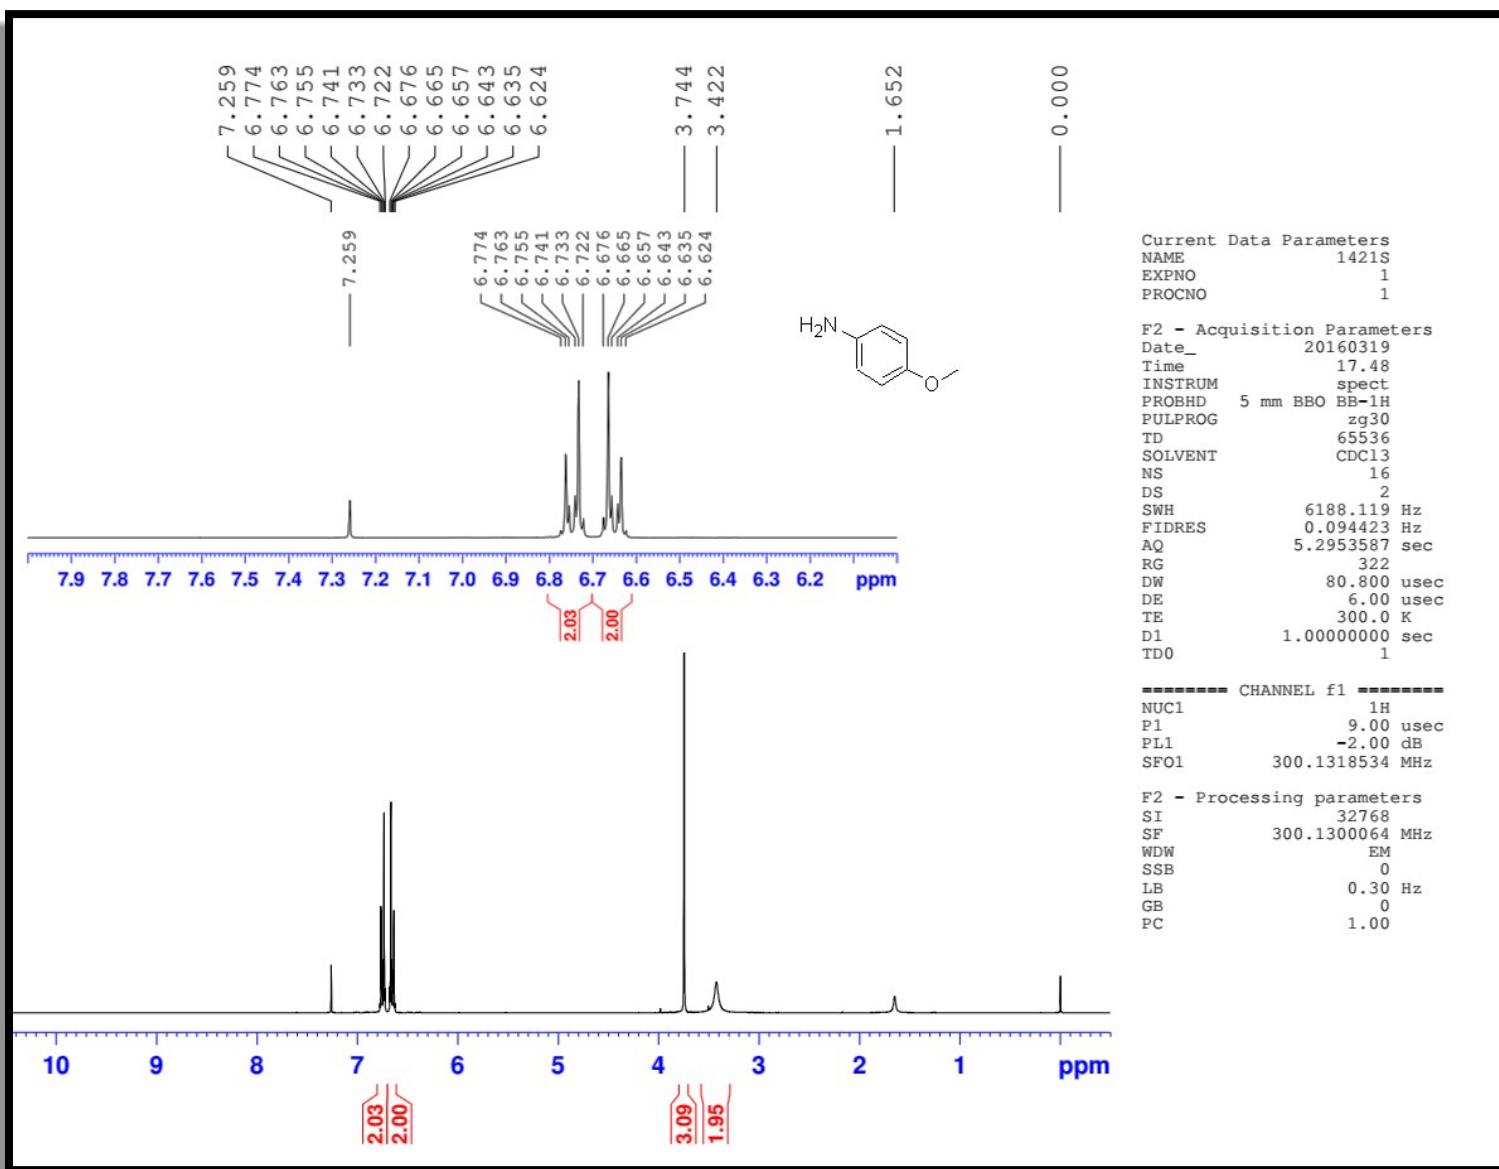

Entry-3

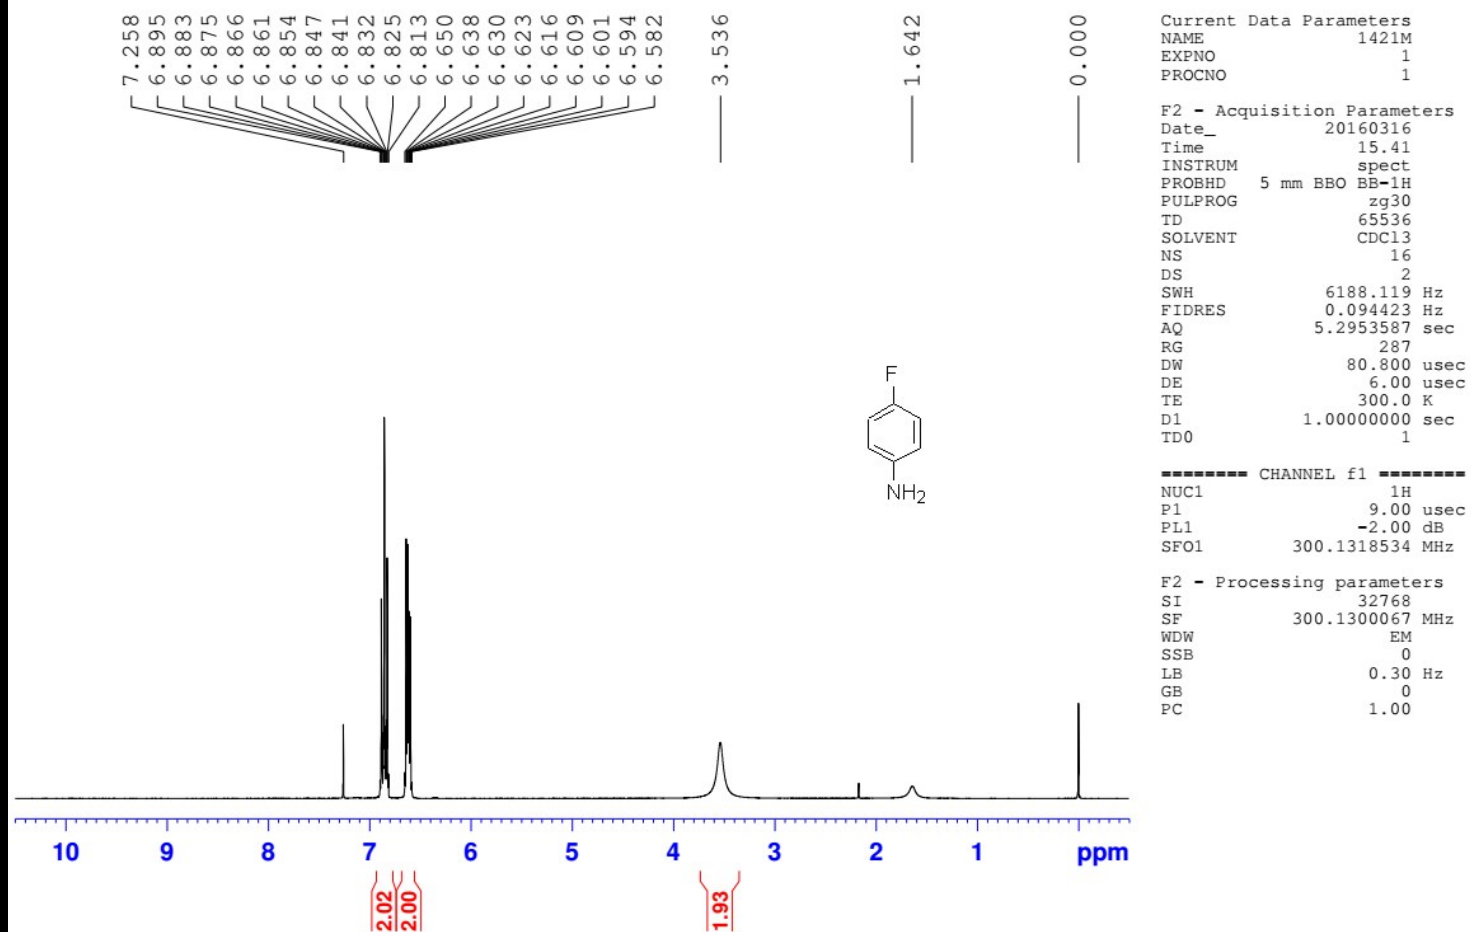

Entry-4

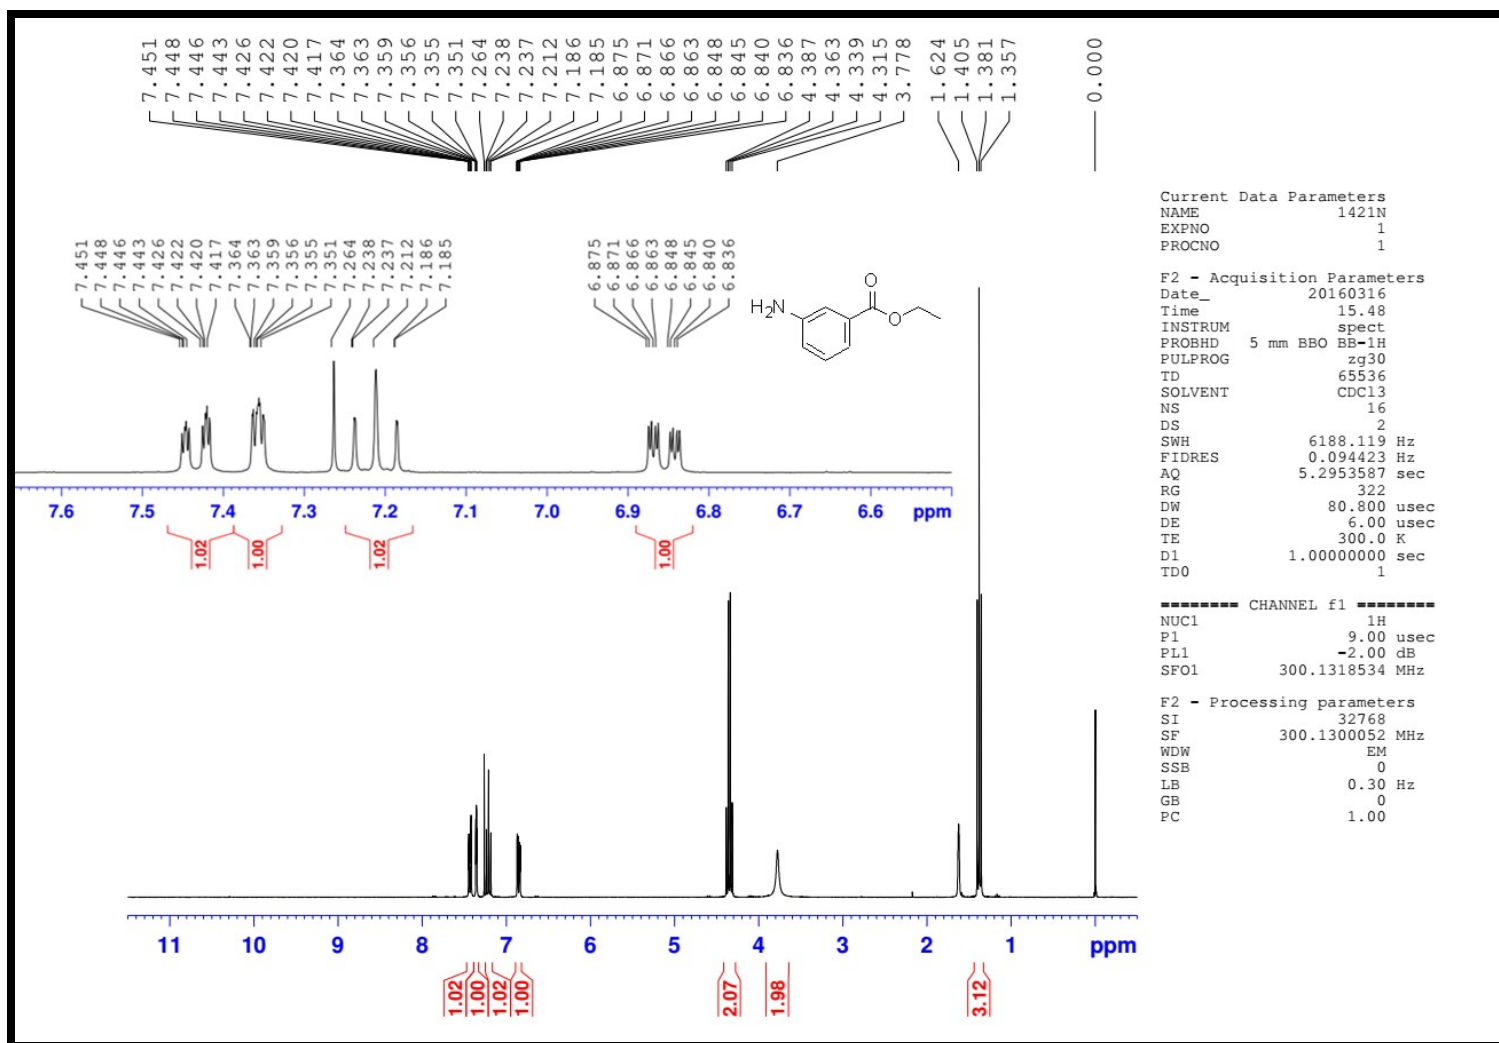

Entry-5



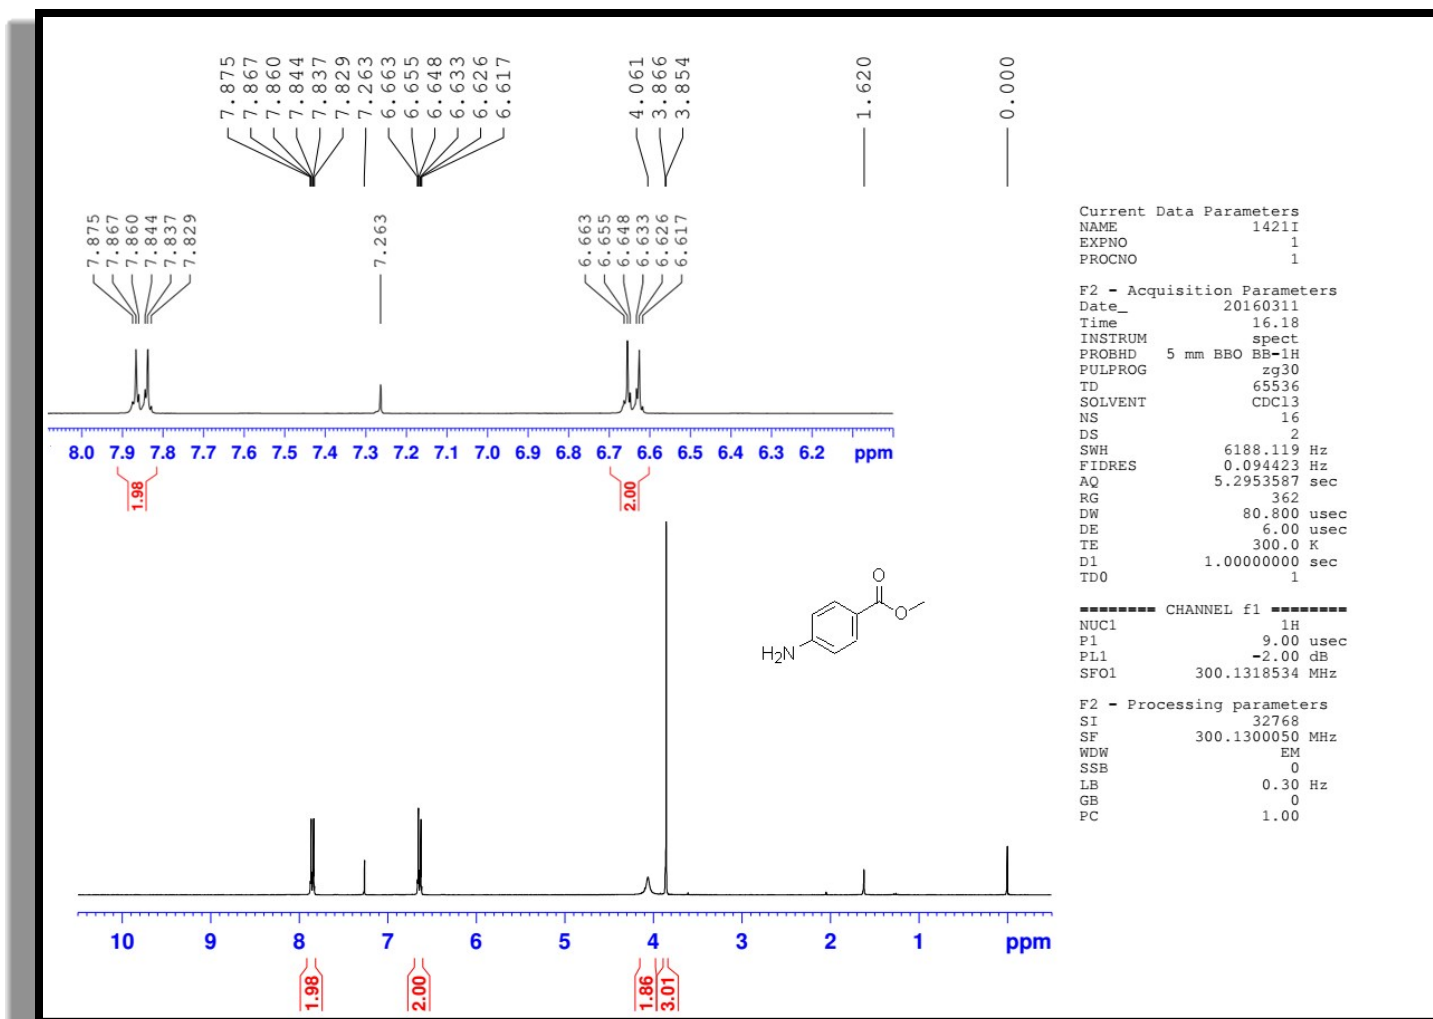

Entry-6

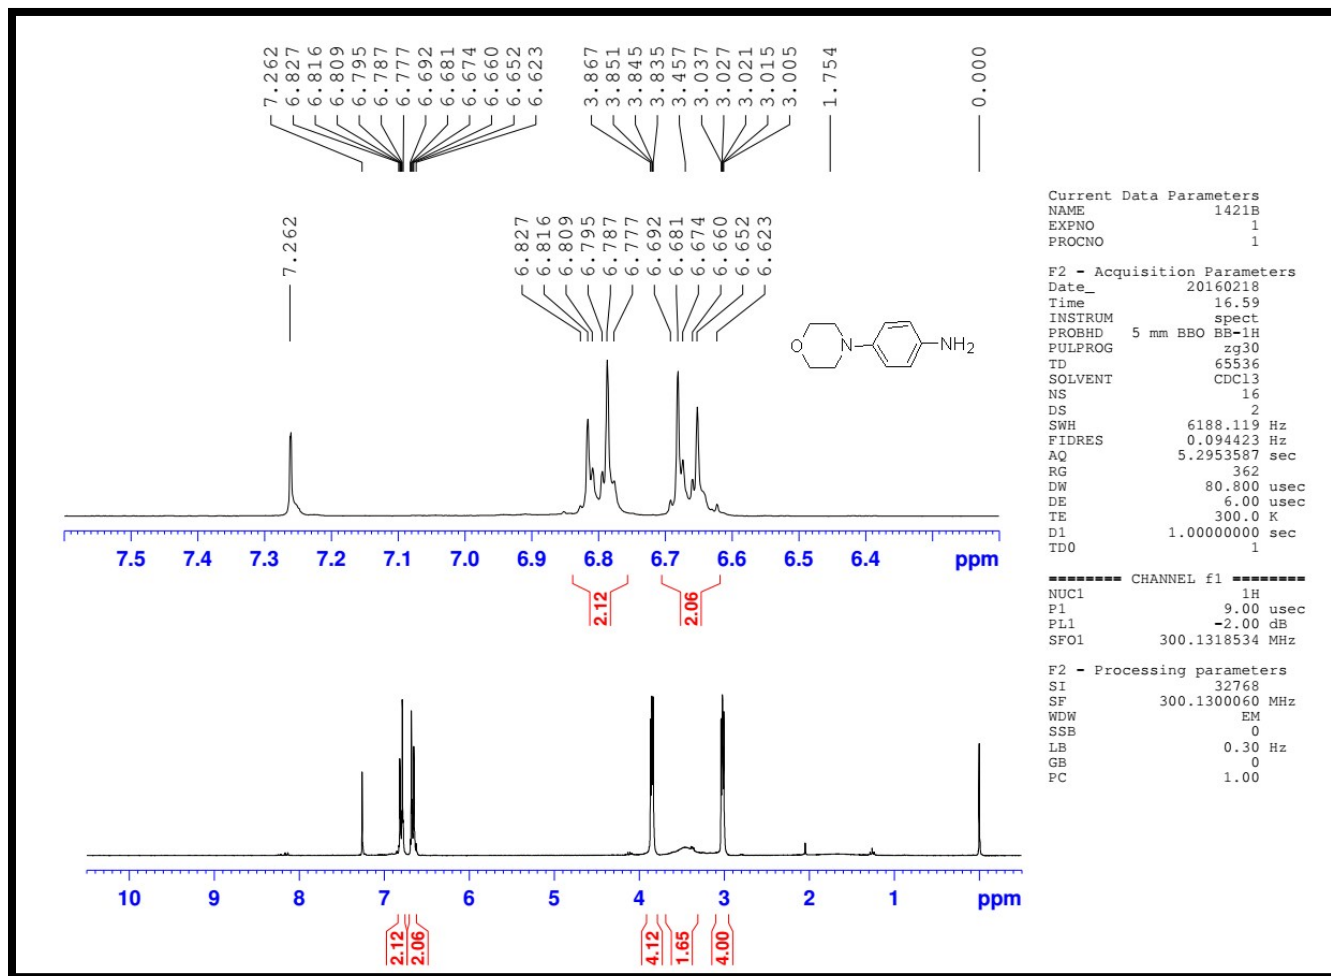

Entry-7

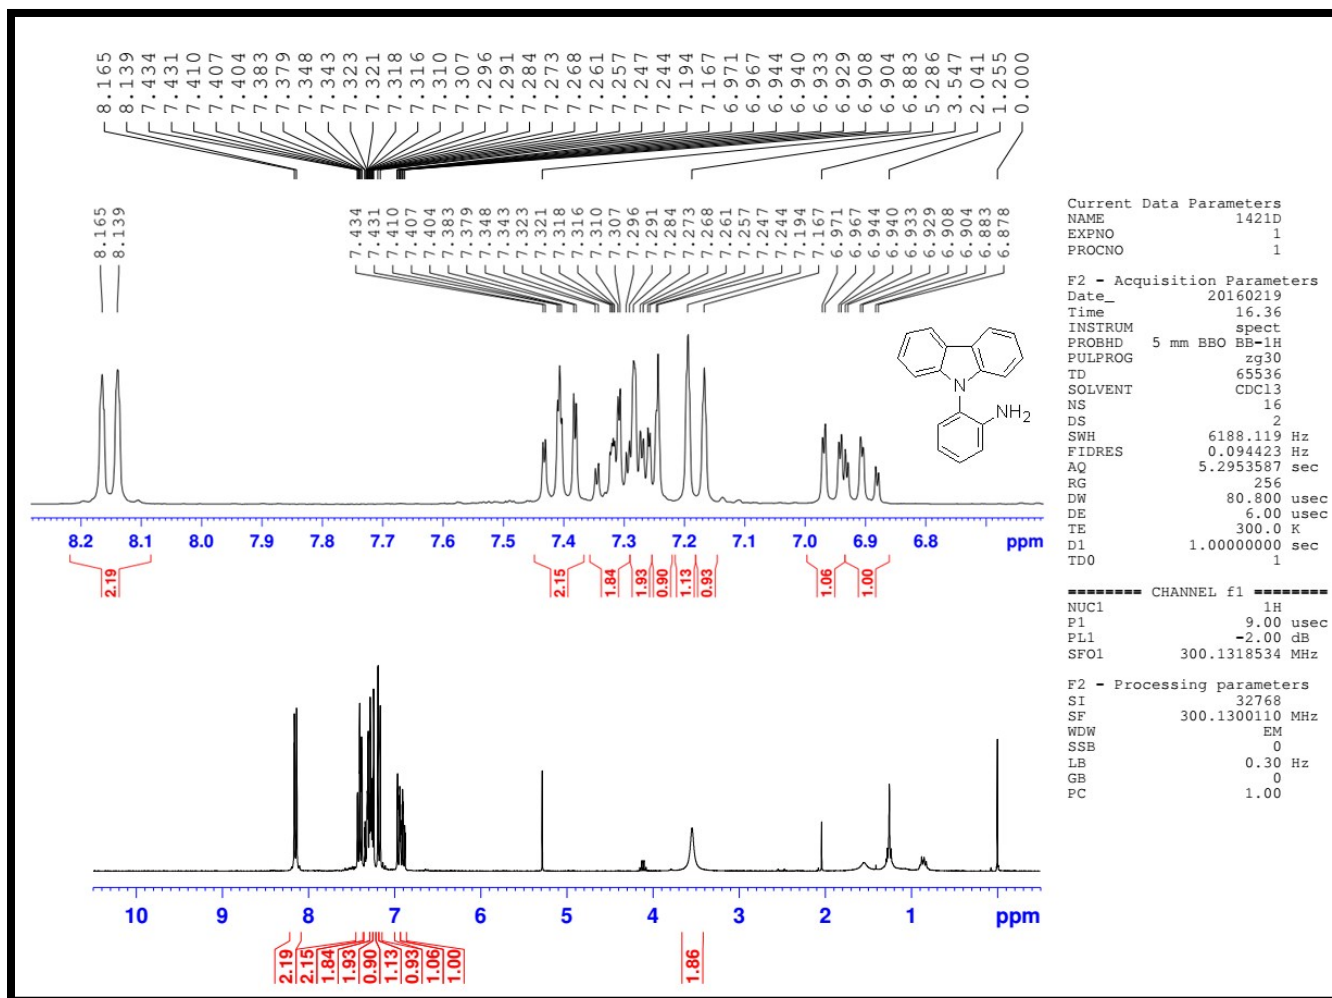

Entry-8

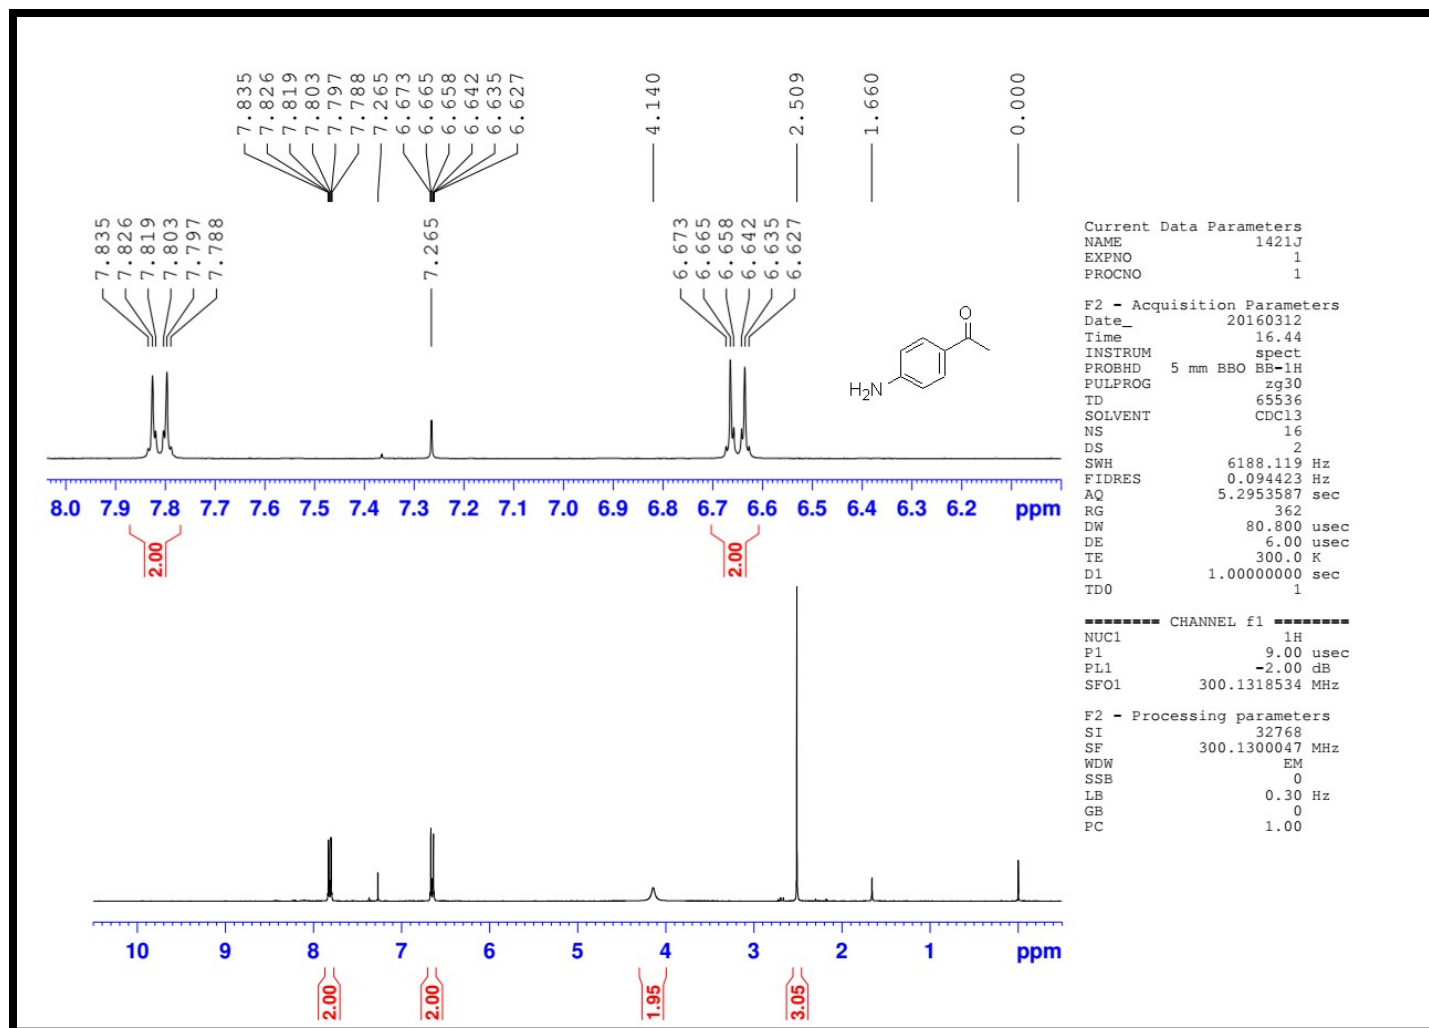

Entry-9

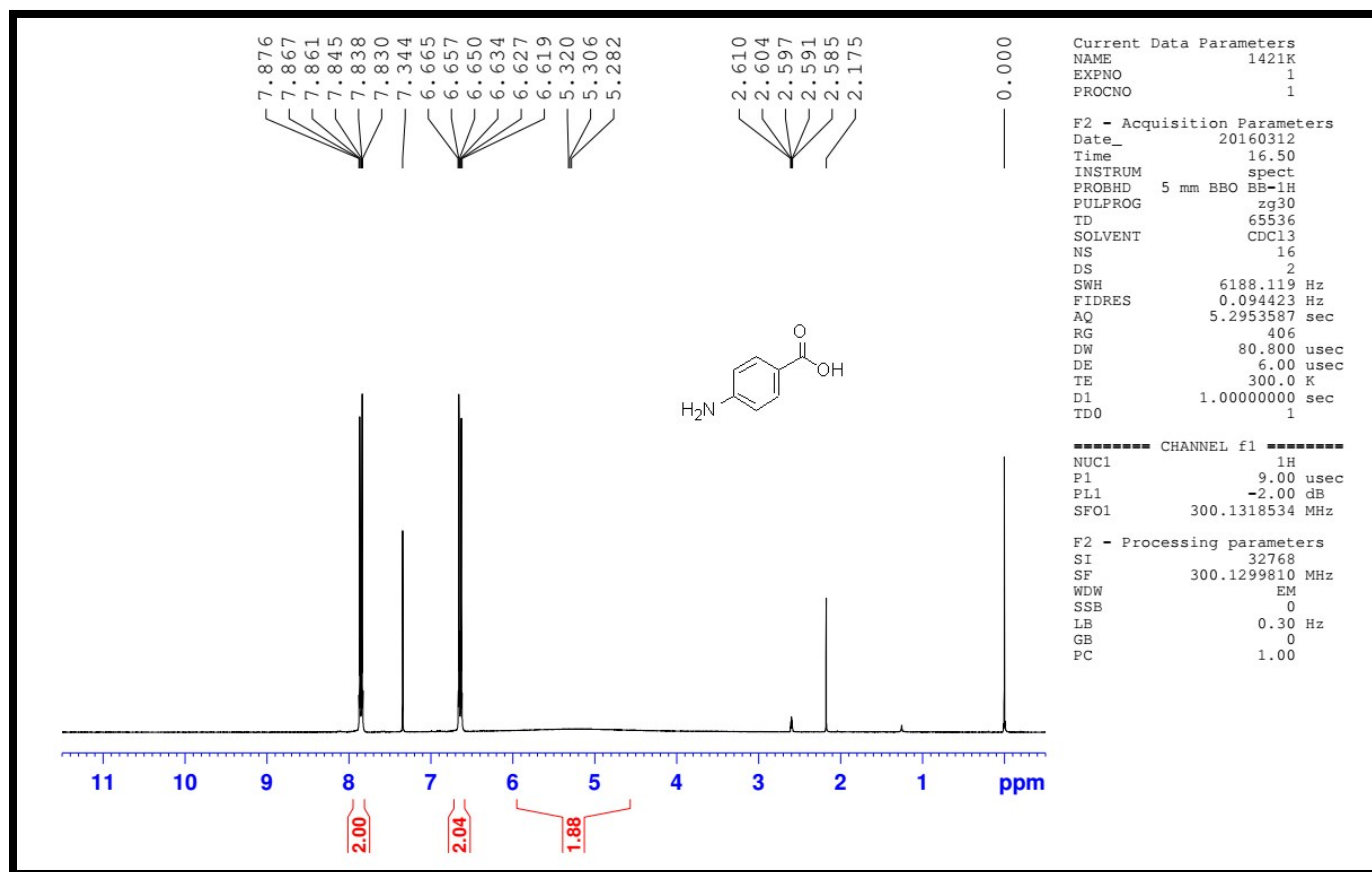

Entry-10

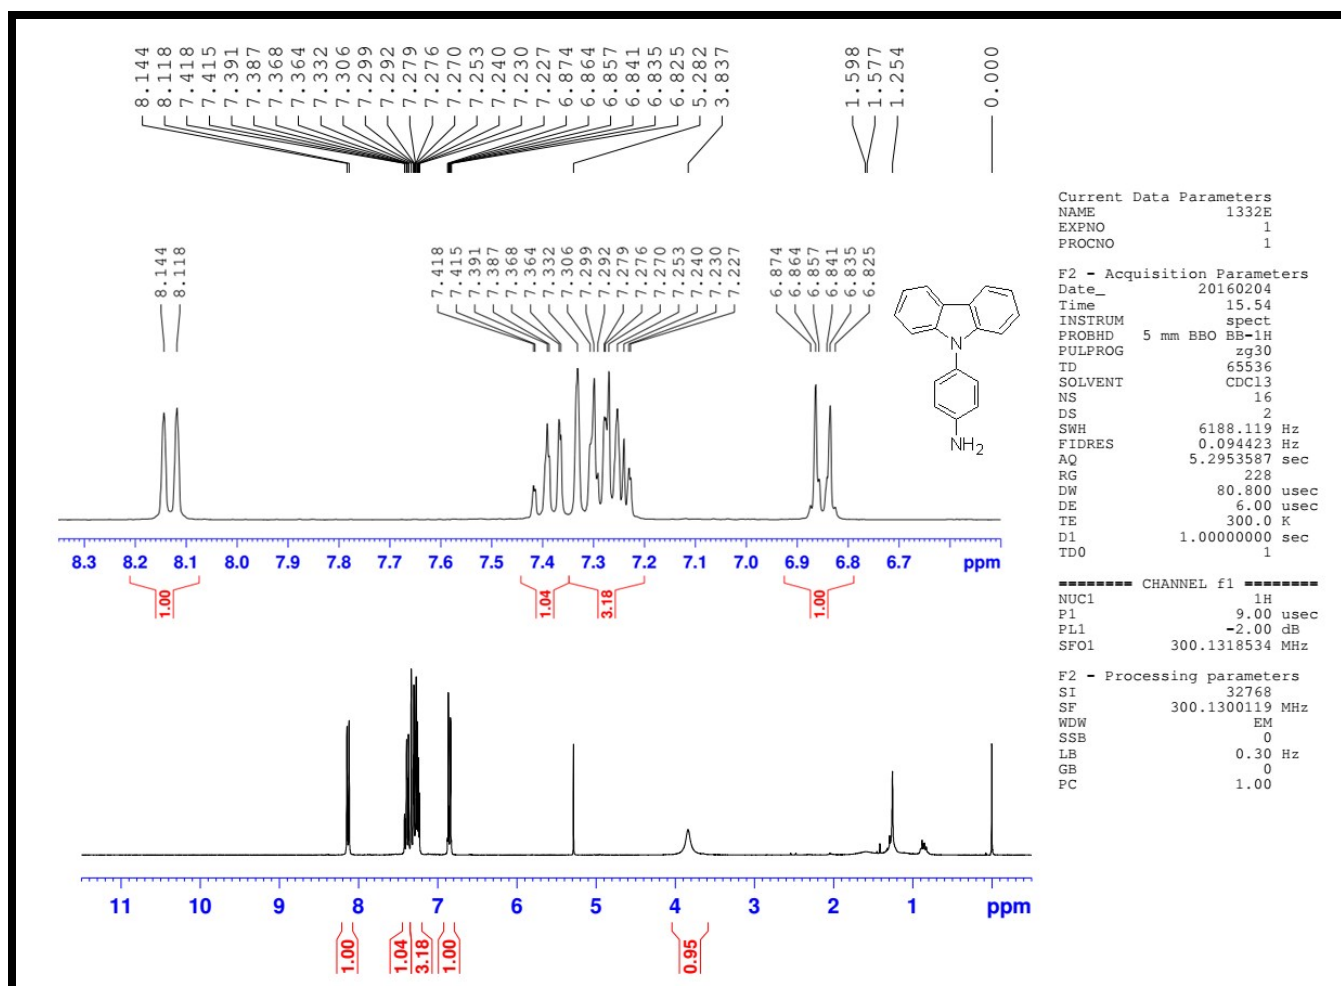

Entry-11
